# Supplementary material for: Evaluation of δ15N analysis to trace the origin of Diaphorina citri (Hemiptera: Liviidae) to citrus orchard fertilization management
Source: PeerJ. 2020 Mar 27;8:e8807. doi: 10.7717/peerj.8807 (PMC7104720; doi:10.7717/peerj.8807)
Supplement: Data S1 [file peerj-08-8807-s002.xlsx]

## Sheet: lab plant material
Fertilization	ACPage	Plant	Leaf	d15N	Namount
Conventional	1d	19	A	4.06361	120.886
Conventional	1d	19	B	3.99945	135.438
Conventional	1d	19	C	4.02473	121.655
Conventional	1d	20	A	3.56635	112.392
Conventional	1d	20	B	3.50903	123.193
Conventional	1d	20	C	3.57711	113.167
Conventional	1d	21	A	3.263	126.264
Conventional	1d	21	B	3.03889	121.655
Conventional	1d	21	C	3.23124	107.739
Conventional	3d	13	A	3.79636	97.6049
Conventional	3d	13	B	3.80329	118.574
Conventional	3d	13	C	3.77724	104.628
Conventional	3d	14	A	2.76008	102.291
Conventional	3d	14	B	2.67016	101.511
Conventional	3d	14	C	2.81511	105.406
Conventional	3d	15	A	3.87892	112.392
Conventional	3d	15	B	3.88978	104.628
Conventional	3d	15	C	3.948	103.07
Conventional	7d	16	A	-0.675558	130.858
Conventional	7d	16	B	-0.6244	122.424
Conventional	7d	16	C	-0.762751	142.279
Conventional	7d	17	A	-0.525459	128.563
Conventional	7d	17	B	-0.577936	156.612
Conventional	7d	17	C	-0.559318	133.913
Conventional	7d	18	A	3.3893	123.193
Conventional	7d	18	B	3.33635	111.618
Conventional	7d	18	C	3.22858	130.858
Conventional	2nd	7	A	1.50216	112.392
Conventional	2nd	7	B	1.41766	115.487
Conventional	2nd	7	C	1.47599	113.167
Conventional	2nd	8	A	3.54111	108.515
Conventional	2nd	8	B	3.5315	107.739
Conventional	2nd	8	C	3.46695	110.843
Conventional	2nd	9	A	4.204	108.515
Conventional	2nd	9	B	4.11404	115.487
Conventional	2nd	9	C	4.25394	99.1685
Conventional	4th	10	A	4.6671	102.291
Conventional	4th	10	B	4.58066	103.849
Conventional	4th	10	C	4.57867	101.511
Conventional	4th	11	A	2.74273	96.8225
Conventional	4th	11	B	2.68543	105.406
Conventional	4th	11	C	2.66723	98.3869
Conventional	4th	12	A	0.0683596	120.116
Conventional	4th	12	B	0.0735204	123.962
Conventional	4th	12	C	0.0892773	128.563
Organic	1d	19	A	6.03681	115.487
Organic	1d	19	B	6.04095	112.392
Organic	1d	19	C	6.02945	130.858
Organic	1d	20	A	11.1697	109.292
Organic	1d	20	B	11.0141	132.387
Organic	1d	20	C	11.1303	105.406
Organic	1d	21	A	8.06058	103.07
Organic	1d	21	B	8.07162	113.94
Organic	1d	21	C	8.04651	111.618
Organic	3d	13	A	6.43056	151.348
Organic	3d	13	B	6.48312	125.497
Organic	3d	13	C	6.40266	146.065
Organic	3d	14	A	8.97037	119.345
Organic	3d	14	B	8.87267	122.424
Organic	3d	14	C	8.88392	134.676
Organic	3d	15	A	6.81807	120.886
Organic	3d	15	B	6.79562	129.329
Organic	3d	15	C	6.95309	111.618
Organic	7d	16	A	11.514	130.858
Organic	7d	16	B	11.6498	111.618
Organic	7d	16	C	11.5863	110.068
Organic	7d	17	A	8.56755	125.497
Organic	7d	17	B	8.63015	140.002
Organic	7d	17	C	8.63372	117.031
Organic	7d	18	A	7.71226	105.406
Organic	7d	18	B	7.71159	114.714
Organic	7d	18	C	7.69814	105.406
Organic	2nd	7	A	6.86946	115.487
Organic	2nd	7	B	6.86769	143.037
Organic	2nd	7	C	6.92191	128.563
Organic	2nd	8	A	7.6654	149.087
Organic	2nd	8	B	7.73014	155.861
Organic	2nd	8	C	7.79764	143.795
Organic	2nd	9	A	7.29924	115.487
Organic	2nd	9	B	7.3397	117.031
Organic	2nd	9	C	7.41761	125.497
Organic	4th	10	A	7.74697	110.068
Organic	4th	10	B	7.68922	104.628
Organic	4th	10	C	7.76347	109.292
Organic	4th	11	A	9.79659	97.6049
Organic	4th	11	B	9.80737	99.1685
Organic	4th	11	C	9.78301	112.392
Organic	4th	12	A	6.39305	103.07
Organic	4th	12	B	6.14451	112.392
Organic	4th	12	C	6.13369	130.858

## Sheet: lab plant material F0
Fertilization	ACPage	Plant	Leaf	d15N	Namount
Organic	0	1	A	8.3225	113.94
Organic	0	1	B	8.40326	106.962
Organic	0	1	C	8.39299	106.962
Organic	0	2	A	7.90394	91.334
Organic	0	2	B	7.97989	96.0397
Organic	0	2	C	7.89609	86.6135
Organic	0	3	A	7.59635	99.9497
Organic	0	3	B	7.60372	98.3869
Organic	0	3	C	7.72048	96.8225
Organic	0	4	A	11.1963	126.264
Organic	0	4	B	11.1889	129.329
Organic	0	4	C	11.2638	125.497
Organic	0	5	A	6.75847	102.291
Organic	0	5	B	6.70107	104.628
Organic	0	5	C	6.70978	120.886
Organic	0	6	A	8.09142	103.849
Organic	0	6	B	7.93781	126.264
Organic	0	6	C	8.00815	102.291
Conventional	0	1	A	2.94866	96.8225
Conventional	0	1	B	2.91101	83.4582
Conventional	0	1	C	2.78685	106.962
Conventional	0	2	A	3.47652	116.259
Conventional	0	2	B	3.46136	127.797
Conventional	0	2	C	3.47295	110.068
Conventional	0	3	A	2.28789	99.9497
Conventional	0	3	B	2.31869	106.962
Conventional	0	3	C	2.32048	106.962
Conventional	0	4	A	2.91365	95.2564
Conventional	0	4	B	2.9896	106.184
Conventional	0	4	C	2.95689	95.2564
Conventional	0	5	A	3.474	113.167
Conventional	0	5	B	3.42216	118.574
Conventional	0	5	C	3.47931	99.1685
Conventional	0	6	A	5.24199	106.962
Conventional	0	6	B	5.35291	106.962
Conventional	0	6	C	5.32255	105.406

## Sheet: lab ACP material
Fertilization	age	plant	ACP	Sex	d15N	Namount
Conventional	1d	19	A	Female	7.25545	17.2224
Conventional	1d	19	A	Male	0.527208	15.4512
Conventional	1d	19	B	Female	6.40794	12.9748
Conventional	1d	19	B	Male	5.50674	12.2829
Conventional	1d	19	C	Female	6.27783	11.3381
Conventional	1d	19	C	Male	4.58214	18.8621
Conventional	1d	20	A	Female	5.03489	11.5019
Conventional	1d	20	A	Male	7.81697	11.8655
Conventional	1d	20	B	Female	6.91789	19.5049
Conventional	1d	20	B	Male	7.17557	15.118
Conventional	1d	20	C	Female	8.77619	17.2224
Conventional	1d	20	C	Male	7.61001	15.7011
Conventional	1d	21	A	Female	6.41995	18.201
Conventional	1d	21	A	Male	6.55631	15.7011
Conventional	1d	21	B	Female	8.14832	14.5281
Conventional	1d	21	B	Male	6.14162	15.9509
Conventional	1d	21	C	Female	7.30416	16.8961
Conventional	3d	13	A	Female	5.27025	21.3774
Conventional	3d	13	A	Male	4.7702	17.7815
Conventional	3d	13	B	Female	5.33182	25.6027
Conventional	3d	13	B	Male	7.46215	18.3635
Conventional	3d	13	C	Female	5.17085	21.7842
Conventional	3d	13	C	Male	4.78776	19.1114
Conventional	3d	14	A	Female	6.29067	13.8743
Conventional	3d	14	A	Male	7.32002	10.8633
Conventional	3d	14	B	Female	6.58015	16.4065
Conventional	3d	14	B	Male	6.31764	15.0347
Conventional	3d	14	C	Female	7.37586	17.0593
Conventional	3d	14	C	Male	7.06209	13.2841
Conventional	3d	15	A	Female	7.87399	19.2605
Conventional	3d	15	A	Male	7.24502	13.4509
Conventional	3d	15	B	Female	6.45045	16.3248
Conventional	3d	15	B	Male	7.92826	15.2013
Conventional	3d	15	C	Female	8.28993	16.3248
Conventional	3d	15	C	Male	7.29451	15.2846
Conventional	7d	16	A	Female	9.02222	8.96198
Conventional	7d	16	A	Male	9.05834	13.9513
Conventional	7d	16	B	Female	8.42514	8.11719
Conventional	7d	16	B	Male	7.33919	6.38688
Conventional	7d	16	C	Female	8.3858	9.20795
Conventional	7d	16	C	Male	7.70971	6.08518
Conventional	7d	17	A	Female	7.86013	12.2385
Conventional	7d	17	A	Male	7.01316	11.782
Conventional	7d	17	B	Female	8.65615	13.5473
Conventional	7d	17	B	Male	6.33632	23.4254
Conventional	7d	17	C	Female	8.93526	15.1817
Conventional	7d	17	C	Male	5.55926	16.7833
Conventional	7d	18	A	Female	8.64459	10.4372
Conventional	7d	18	A	Male	6.7384	11.1974
Conventional	7d	18	B	Female	7.52151	11.7475
Conventional	7d	18	B	Male	7.38224	9.86038
Conventional	7d	18	C	Female	8.11693	9.37191
Conventional	7d	18	C	Male	9.75205	7.18273
Conventional	2nd	7	A	Female	4.40035	8.63396
Conventional	2nd	7	A	Male	3.06406	11.1974
Conventional	2nd	7	B	Female	4.89814	10.1095
Conventional	2nd	7	B	Male	3.82859	9.27505
Conventional	2nd	7	C	Female	3.43686	11.1744
Conventional	2nd	7	C	Male	4.16648	9.10777
Conventional	2nd	8	A	Female	3.77413	9.61782
Conventional	2nd	9	A	Female	3.38606	9.20795
Conventional	2nd	9	A	Male	1.92104	6.79742
Conventional	2nd	9	B	Female	3.85199	6.33595
Conventional	2nd	9	B	Male	3.42691	7.69352
Conventional	4th	10	A	Female	6.13178	12.3203
Conventional	4th	10	A	Male	5.04082	10.7797
Conventional	4th	10	B	Female	4.13278	12.2385
Conventional	4th	10	B	Male	6.25917	9.27505
Conventional	4th	10	C	Female	5.40494	11.0925
Conventional	4th	10	C	Male	5.31512	9.77678
Conventional	4th	11	A	Female	4.84818	11.42
Conventional	4th	11	A	Male	4.23782	9.44231
Conventional	4th	11	B	Male	4.8184	6.42878
Conventional	4th	12	A	Female	5.11407	6.0649
Conventional	4th	12	A	Male	3.49789	6.04328
Conventional	4th	12	B	Female	3.35431	6.76297
Conventional	4th	12	B	Male	4.99022	6.00975
Conventional	0	1-6	A	Female	0.923026	14.0378
Conventional	0	1-6	A	Male	0.119018	13.5343
Conventional	0	1-6	B	Female	-0.157945	20.3193
Conventional	0	1-6	B	Male	-0.00393616	17.0329
Conventional	0	1-6	C	Female	0.557528	19.5049
Conventional	0	1-6	C	Male	2.06501	15.118
Conventional	0	1-6	D	Female	0.52693	18.038
Conventional	0	1-6	D	Male	0.423208	14.7014
Conventional	0	1-6	E	Female	2.21905	21.8655
Conventional	0	1-6	E	Male	-2.0186	17.2825
Organic	1d	19	A	Female	6.01701	16.5697
Organic	1d	19	A	Male	4.61562	15.8676
Organic	1d	19	B	Female	5.3908	17.2224
Organic	1d	19	C	Female	4.19811	18.5271
Organic	1d	20	A	Female	8.20378	15.3451
Organic	1d	20	A	Male	5.1136	17.1993
Organic	1d	20	B	Female	8.41493	20.4822
Organic	1d	20	B	Male	5.99586	16.4504
Organic	1d	20	C	Female	8.38246	15.0183
Organic	1d	20	C	Male	7.57985	11.1139
Organic	1d	21	A	Female	6.30713	21.2961
Organic	1d	21	A	Male	5.84228	17.6152
Organic	1d	21	B	Female	6.88493	23.7352
Organic	1d	21	B	Male	6.2669	19.7759
Organic	1d	21	C	Female	6.40687	22.2722
Organic	1d	21	C	Male	5.77411	15.8676
Organic	3d	13	A	Female	4.74038	25.5216
Organic	3d	13	A	Male	4.70359	19.5268
Organic	3d	13	B	Female	6.12161	23.7352
Organic	3d	13	B	Male	5.53775	18.6959
Organic	3d	13	C	Male	4.36952	18.4466
Organic	3d	14	A	Female	6.58784	21.5401
Organic	3d	14	A	Male	6.1866	12.0325
Organic	3d	14	B	Female	6.33699	16.8961
Organic	3d	14	B	Male	6.75748	13.9513
Organic	3d	14	C	Female	6.26857	19.5864
Organic	3d	14	C	Male	8.4492	15.118
Organic	3d	15	A	Female	5.82326	24.3038
Organic	3d	15	A	Male	5.90853	18.4466
Organic	3d	15	B	Female	5.94354	26.4951
Organic	3d	15	B	Male	6.11132	20.1911
Organic	3d	15	C	Female	6.24245	28.4404
Organic	3d	15	C	Male	5.47642	18.6128
Organic	7d	16	A	Female	5.5675	10.0276
Organic	7d	16	B	Female	4.51613	15.835
Organic	7d	16	C	Female	5.78164	21.7028
Organic	7d	16	D	Female	5.52764	10.3553
Organic	7d	16	E	Female	5.2248	22.0282
Organic	7d	17	A	Female	4.75438	15.6717
Organic	7d	17	A	Male	4.5451	11.8655
Organic	7d	17	B	Female	5.73944	17.2224
Organic	7d	17	B	Male	5.22353	11.615
Organic	7d	17	C	Female	5.37207	18.5271
Organic	7d	17	C	Male	5.40092	10.529
Organic	7d	18	A	Female	5.31997	13.629
Organic	7d	18	A	Male	5.41851	10.6126
Organic	7d	18	B	Female	4.19789	17.0593
Organic	7d	18	B	Male	4.10383	18.3635
Organic	7d	18	C	Female	4.61628	18.8531
Organic	7d	18	C	Male	5.1324	17.2825
Organic	2nd	7	A	Female	6.11822	13.2202
Organic	2nd	7	A	Male	5.40057	8.35479
Organic	2nd	7	B	Male	5.30202	9.44231
Organic	2nd	8	A	Female	7.68895	12.6476
Organic	2nd	8	A	Male	7.08247	14.0346
Organic	2nd	8	B	Female	7.23542	21.0519
Organic	2nd	8	B	Male	7.29822	19.1945
Organic	2nd	8	C	Female	8.40419	11.5019
Organic	2nd	8	C	Male	6.88239	16.6168
Organic	2nd	9	A	Female	6.60702	17.2224
Organic	2nd	9	A	Male	5.69017	18.6959
Organic	2nd	9	B	Female	7.25361	17.9564
Organic	2nd	9	B	Male	4.70997	10.6126
Organic	2nd	9	C	Female	5.86378	22.9226
Organic	2nd	9	C	Male	6.05729	15.2846
Organic	4th	10	A	Female	7.50044	14.5281
Organic	4th	10	A	Male	6.85893	9.77678
Organic	4th	10	B	Female	7.79847	14.1195
Organic	4th	10	B	Male	7.69823	14.0346
Organic	4th	10	C	Female	7.44135	16.0799
Organic	4th	10	C	Male	5.60512	8.85682
Organic	4th	11	A	Female	9.53863	14.5281
Organic	4th	11	A	Male	8.55573	13.0339
Organic	4th	11	B	Female	8.55368	14.0378
Organic	4th	11	B	Male	7.15244	10.2783
Organic	4th	11	C	Female	9.43884	14.6098
Organic	4th	11	C	Male	8.01722	11.615
Organic	4th	12	A	Female	5.42196	15.4267
Organic	4th	12	A	Male	5.15726	11.949
Organic	4th	12	B	Female	5.88869	14.283
Organic	4th	12	B	Male	6.13837	13.2841
Organic	4th	12	C	Female	5.8688	14.4464
Organic	4th	12	C	Male	6.14245	14.5348
Organic	0	1-6	A	Female	-0.294049	14.2012
Organic	0	1-6	A	Male	1.37915	12.7836
Organic	0	1-6	B	Female	3.45796	21.3774
Organic	0	1-6	B	Male	-0.158082	18.0309
Organic	0	1-6	C	Female	1.5374	18.4456
Organic	0	1-6	C	Male	0.32852	14.5348
Organic	0	1-6	D	Female	2.58342	22.76
Organic	0	1-6	D	Male	-0.0375124	17.2825
Organic	0	1-6	E	Female	3.33686	19.0976
Organic	0	1-6	E	Male	2.12142	14.118

## Sheet: lab ACP material F0
Fertilization	age	plant	ACP	Sex	d15N	Namount
Conventional	0	1-6	A	Female	0.923026	14.0378
Conventional	0	1-6	A	Male	0.119018	13.5343
Conventional	0	1-6	B	Female	-0.157945	20.3193
Conventional	0	1-6	B	Male	-0.00393616	17.0329
Conventional	0	1-6	C	Female	0.557528	19.5049
Conventional	0	1-6	C	Male	2.06501	15.118
Conventional	0	1-6	D	Female	0.52693	18.038
Conventional	0	1-6	D	Male	0.423208	14.7014
Conventional	0	1-6	E	Female	2.21905	21.8655
Conventional	0	1-6	E	Male	-2.0186	17.2825
Organic	0	1-6	A	Female	-0.294049	14.2012
Organic	0	1-6	A	Male	1.37915	12.7836
Organic	0	1-6	B	Female	3.45796	21.3774
Organic	0	1-6	B	Male	-0.158082	18.0309
Organic	0	1-6	C	Female	1.5374	18.4456
Organic	0	1-6	C	Male	0.32852	14.5348
Organic	0	1-6	D	Female	2.58342	22.76
Organic	0	1-6	D	Male	-0.0375124	17.2825
Organic	0	1-6	E	Female	3.33686	19.0976
Organic	0	1-6	E	Male	2.12142	14.118

## Sheet: Exclusion cages
Fertilization	Orchard	tree	cage	Leaf	d15N	N Amount (ug)	Type of Material
Conventional	C4	1	1		9.96076	14.836	Arthropod
Conventional	C4	1	1		10.775	13.1967	Arthropod
Conventional	C4	1	1		9.91583	12.6938	Arthropod
Conventional	C4	1	2		8.57447	15.8576	Arthropod
Conventional	C4	1	2		9.80023	15.2997	Arthropod
Conventional	C4	1	2		8.95528	16.4968	Arthropod
Conventional	C4	1	3		9.02766	12.2045	Arthropod
Conventional	C4	1	3		8.61902	12.6235	Arthropod
Conventional	C4	1	3		8.73396	12.2967	Arthropod
Conventional	C4	11	1		7.5961	14.8965	Arthropod
Conventional	C4	11	1		7.34433	15.6151	Arthropod
Conventional	C4	11	1		7.56164	12.9066	Arthropod
Conventional	C4	11	2		6.9646	19.7153	Arthropod
Conventional	C4	11	2		6.94509	19.7598	Arthropod
Conventional	C4	12	1		6.7059	15.1516	Arthropod
Conventional	C4	12	1		6.53635	17.2698	Arthropod
Conventional	C4	12	1		7.8398	12.6707	Arthropod
Conventional	C4	12	1		7.75222	13.1346	Arthropod
Conventional	C4	12	1		6.76035	14.3673	Arthropod
Conventional	C4	12	1		7.49035	12.0422	Arthropod
Conventional	C4	13	1		6.56334	16.9788	Arthropod
Conventional	C4	13	1		6.94658	15.3558	Arthropod
Conventional	C4	13	1		5.93432	13.7319	Arthropod
Conventional	C4	13	2		6.65462	18.3928	Arthropod
Conventional	C4	13	2		6.87618	16.5133	Arthropod
Conventional	C4	13	2		7.10276	14.7795	Arthropod
Conventional	C4	13	3		6.98346	17.5253	Arthropod
Conventional	C4	13	3		6.30214	10.5893	Arthropod
Conventional	C4	13	3		7.28923	17.3924	Arthropod
Conventional	C4	14	1		4.95616	18.4679	Arthropod
Conventional	C4	14	1		5.04986	15.6314	Arthropod
Conventional	C4	14	1		5.42888	12.9817	Arthropod
Conventional	C4	15	1		6.38443	17.5361	Arthropod
Conventional	C4	15	1		6.3371	14.9641	Arthropod
Conventional	C4	15	1		6.28671	16.8496	Arthropod
Conventional	C4	16	2		7.1089	13.3311	Arthropod
Conventional	C4	16	2		6.59929	11.433	Arthropod
Conventional	C4	16	2		6.69062	10.6637	Arthropod
Conventional	C4	2	1		8.73622	17.2974	Arthropod
Conventional	C4	2	1		9.23125	17.9791	Arthropod
Conventional	C4	2	1		9.61128	14.5211	Arthropod
Conventional	C4	3	2		6.75243	15.9123	Arthropod
Conventional	C4	3	2		6.80692	14.7174	Arthropod
Conventional	C4	3	2		6.40596	15.4161	Arthropod
Conventional	C4	4	1		7.43867	16.2758	Arthropod
Conventional	C4	4	1		7.45549	14.1814	Arthropod
Conventional	C4	4	1		7.81124	15.0762	Arthropod
Conventional	C4	4	2		7.39706	16.5622	Arthropod
Conventional	C4	4	2		7.54565	12.8884	Arthropod
Conventional	C4	4	2		7.64506	12.6548	Arthropod
Conventional	C4	4	3		7.91569	15.6032	Arthropod
Conventional	C4	4	3		7.92985	15.4972	Arthropod
Conventional	C4	4	3		7.53706	11.1079	Arthropod
Conventional	C4	5	1		6.93083	15.3031	Arthropod
Conventional	C4	5	1		6.65533	16.2831	Arthropod
Conventional	C4	5	1		6.68935	13.7516	Arthropod
Conventional	C4	5	2		5.6618	12.2484	Arthropod
Conventional	C4	5	2		5.55156	10.8864	Arthropod
Conventional	C4	6	1		8.50375	15.8991	Arthropod
Conventional	C4	6	1		8.13737	12.7621	Arthropod
Conventional	C4	6	1		8.34275	12.0873	Arthropod
Conventional	C4	6	2		9.00916	15.6528	Arthropod
Conventional	C4	6	2		9.14887	14.5262	Arthropod
Conventional	C4	6	2		8.24794	10.7803	Arthropod
Conventional	C4	7	1		7.41758	15.4178	Arthropod
Conventional	C4	7	1		7.22633	13.21	Arthropod
Conventional	C4	7	1		7.89198	12.9289	Arthropod
Conventional	C4	7	2		6.97652	14.1582	Arthropod
Conventional	C4	7	2		6.96062	13.6024	Arthropod
Conventional	C4	7	2		7.18174	13.644	Arthropod
Conventional	C4	8	1		6.56581	14.8831	Arthropod
Conventional	C4	8	1		6.88722	16.9322	Arthropod
Conventional	C4	8	1		6.77342	14.9091	Arthropod
Conventional	C4	8	2		9.3756	16.88	Arthropod
Conventional	C4	8	2		8.47019	15.4092	Arthropod
Conventional	C4	8	2		8.52532	14.3434	Arthropod
Conventional	C4	9	1		6.90336	16.6524	Arthropod
Conventional	C4	9	1		6.24229	14.7224	Arthropod
Conventional	C4	9	1		6.75886	14.703	Arthropod
Organic	O1	1	1		5.07045	15.8916	Arthropod
Organic	O1	1	2		4.97127	16.7823	Arthropod
Organic	O1	2	1		9.04342	15.2436	Arthropod
Organic	O1	2	2		8.53719	11.9193	Arthropod
Organic	O1	2	2		8.72659	7.83359	Arthropod
Organic	O1	2	3		8.42398	17.5917	Arthropod
Organic	O1	3	1		8.59695	12.4873	Arthropod
Organic	O1	3	1		8.35177	10.9453	Arthropod
Organic	O1	3	2		7.02764	3.70714	Arthropod
Organic	O1	3	3		5.5494	10.9453	Arthropod
Organic	O1	3	3		3.39416	9.64596	Arthropod
Organic	O1	5	1		9.70617	11.5947	Arthropod
Organic	O1	5	2		11.3095	16.8633	Arthropod
Organic	O1	5	2		11.0268	15.0006	Arthropod
Organic	O1	6	1		13.5798	17.5108	Arthropod
Organic	O1	7	1		9.99742	12.4061	Arthropod
Organic	O1	7	1		9.88345	13.7848	Arthropod
Organic	O1	7	2		10.5583	15.8106	Arthropod
Organic	O1	7	3		11.3104	11.27	Arthropod
Organic	O1	7	3		11.2715	10.9453	Arthropod
Organic	O1	7	4		10.5585	15.2436	Arthropod
Organic	O1	8	1		9.59358	11.8382	Arthropod
Organic	O1	8	1		9.18546	13.2983	Arthropod
Organic	O1	8	2		13.4586	14.6764	Arthropod
Organic	O1	9	1		11.6856	15.1626	Arthropod
Organic	O1	9	1		11.6909	12.5684	Arthropod
Organic	O1	9	2		12.8271	16.7823	Arthropod
Organic	O1	9	3		10.8668	12.6495	Arthropod
Organic	O1	9	3		11.766	19.0477	Arthropod
Organic	O1	10	1		16.3316	12.325	Arthropod
Organic	O1	10	2		14.3413	17.4298	Arthropod
Organic	O1	10	2		13.474	14.1902	Arthropod
Organic	O1	10	3		12.5725	11.757	Arthropod
Organic	O1	10	4		11.7286	17.5917	Arthropod
Organic	O1	10	4		12.1895	23.1676	Arthropod
Organic	O4	1	1		5.36907	10.9453	Arthropod
Organic	O4	1	2		5.90996	13.0551	Arthropod
Organic	O4	2	1		3.84045	14.028	Arthropod
Organic	O4	2	2		3.96387	15.7296	Arthropod
Organic	O4	3	1		5.6628	15.0816	Arthropod
Organic	O4	3	2		5.62179	10.9453	Arthropod
Organic	O4	3	2		5.50344	15.8916	Arthropod
Organic	O4	3	3		4.61563	14.2712	Arthropod
Organic	O4	4	1		4.81461	15.0006	Arthropod
Organic	O4	4	1		4.66599	15.8106	Arthropod
Organic	O4	4	2		3.98276	16.8633	Arthropod
Organic	O4	4	3		3.40106	15.6486	Arthropod
Organic	O4	4	3		3.58695	13.5416	Arthropod
Organic	O4	5	3		4.83217	18.9669	Arthropod
Organic	O4	6	1		5.69414	18.8051	Arthropod
Organic	O4	6	1		5.61455	17.8344	Arthropod
Organic	O4	6	2		4.84609	6.8902	Arthropod
Organic	O4	6	2		4.46453	7.32129	Arthropod
Organic	O4	6	3		4.46745	12.2439	Arthropod
Organic	O4	8	1		5.60492	19.2095	Arthropod
Organic	O4	8	2		5.6488	13.8659	Arthropod
Organic	O4	9	1		6.73256	16.0536	Arthropod
Organic	O4	10	1		5.54035	15.3246	Arthropod
Organic	O4	10	1		4.90298	17.7535	Arthropod
Organic	O4	10	2		5.89368	19.6945	Arthropod
Organic	O4	10	3		5.64294	16.7014	Arthropod
Organic	O4	10	3		5.35135	16.4585	Arthropod
Organic	O4	11	1		4.94121	11.1889	Arthropod
Organic	O4	12	1		5.12917	18.0771	Arthropod
Organic	O4	12	1		5.09879	20.3411	Arthropod
Organic	O4	12	2		5.58807	14.3523	Arthropod
Organic	O4	13	1		5.37155	16.7823	Arthropod
Organic	O4	13	2		4.90997	15.6486	Arthropod
Organic	O4	14	1		5.5621	16.2156	Arthropod
Organic	O4	15	2		5.1959	19.2903	Arthropod
Organic	O4	15	2		5.24816	14.4333	Arthropod
Organic	O4	15	4		5.76464	10.2957	Arthropod
Organic	O4	16	1		5.37168	10.5394	Arthropod
Organic	O4	16	2		5.46918	13.6227	Arthropod
Conventional	C1	2	1		4.82967	14.028	Arthropod
Conventional	C1	2	3		5.12119	18.3198	Arthropod
Conventional	C1	2	4		4.42983	16.8633	Arthropod
Conventional	C1	2	4		4.20069	16.8633	Arthropod
Conventional	C1	4	1		6.45508	21.3106	Arthropod
Conventional	C1	4	2		5.917	12.8117	Arthropod
Conventional	C1	4	2		5.95376	13.2172	Arthropod
Conventional	C1	6	1		4.90365	17.8344	Arthropod
Conventional	C1	6	1		5.86919	16.2965	Arthropod
Conventional	C1	8	4		4.03976	17.9962	Arthropod
Conventional	C1	9	1		4.94767	10.2957	Arthropod
Conventional	C1	12	2		4.8936	18.2389	Arthropod
Conventional	C1	12	2		4.89369	18.3198	Arthropod
Conventional	C1	14	1		4.07575	14.7575	Arthropod
Conventional	C1	14	1		4.47821	18.6434	Arthropod
Conventional	C1	15	1		4.56851	10.7018	Arthropod
Organic	O1	1	3		4.81987	12.9992	Arthropod
Organic	O1	2	1		8.85291	11.9554	Arthropod
Organic	O1	2	1		9.38597	13.7215	Arthropod
Organic	O1	2	2		8.81151	13.7215	Arthropod
Organic	O1	2	3		7.70836	17.4097	Arthropod
Organic	O1	2	3		8.5622	15.6466	Arthropod
Organic	O1	3	1		8.16722	8.98177	Arthropod
Organic	O1	3	2		6.1442	10.9914	Arthropod
Organic	O1	3	2		6.13782	9.94662	Arthropod
Organic	O1	3	3		5.07423	10.1074	Arthropod
Organic	O1	5	1		9.06456	12.4372	Arthropod
Organic	O1	5	1		9.16194	10.7503	Arthropod
Organic	O1	5	2		11.8376	14.2832	Arthropod
Organic	O1	6	1		13.9655	13.882	Arthropod
Organic	O1	6	1		13.4331	12.9189	Arthropod
Organic	O1	7	1		9.76774	10.5093	Arthropod
Organic	O1	7	2		11.0731	12.678	Arthropod
Organic	O1	7	2		9.22512	5.14226	Arthropod
Organic	O1	7	3		11.116	9.94662	Arthropod
Organic	O1	7	4		10.7116	14.604	Arthropod
Organic	O1	7	4		9.818	12.4372	Arthropod
Organic	O1	8	1		9.05584	11.6341	Arthropod
Organic	O1	8	2		12.5677	12.2766	Arthropod
Organic	O1	8	2		13.2223	13.882	Arthropod
Organic	O1	9	1		11.5616	14.1227	Arthropod
Organic	O1	9	2		13.694	11.1521	Arthropod
Organic	O1	9	2		12.709	15.0853	Arthropod
Organic	O1	9	3		11.8116	12.9992	Arthropod
Organic	O1	10	1		16.5622	13.3202	Arthropod
Organic	O1	10	1		16.6971	12.1963	Arthropod
Organic	O1	10	2		13.8861	10.67	Arthropod
Organic	O1	10	3		12.2145	12.7583	Arthropod
Organic	O1	10	3		11.4885	13.4005	Arthropod
Organic	O1	10	4		12.0464	13.0794	Arthropod
Organic	O4	1	1		5.23522	11.4734	Arthropod
Organic	O4	1	1		5.67337	10.7503	Arthropod
Organic	O4	1	2		5.81566	10.3485	Arthropod
Organic	O4	2	3		3.84407	14.7645	Arthropod
Organic	O4	3	1		5.41892	14.1227	Arthropod
Organic	O4	3	1		6.24067	12.5978	Arthropod
Organic	O4	3	2		5.0927	13.0794	Arthropod
Organic	O4	3	3		4.70131	19.4115	Arthropod
Organic	O4	3	3		4.46671	13.0794	Arthropod
Organic	O4	4	1		4.20355	12.9189	Arthropod
Organic	O4	4	2		4.20068	13.1597	Arthropod
Organic	O4	4	2		4.35684	15.0051	Arthropod
Organic	O4	4	3		3.22693	12.8386	Arthropod
Organic	O4	5	3		4.72383	16.4482	Arthropod
Organic	O4	5	3		5.15458	15.2457	Arthropod
Organic	O4	6	1		5.2612	12.5175	Arthropod
Organic	O4	6	3		5.16204	17.2495	Arthropod
Organic	O4	6	3		5.50403	9.38384	Arthropod
Organic	O4	7	1		5.71262	8.74049	Arthropod
Organic	O4	8	3		5.50716	14.2832	Arthropod
Organic	O4	9	2		6.48434	12.0357	Arthropod
Organic	O4	9	3		6.16569	15.3258	Arthropod
Organic	O4	10	1		4.72136	14.7645	Arthropod
Organic	O4	10	2		5.71938	16.4482	Arthropod
Organic	O4	10	2		8.04237	17.4898	Arthropod
Organic	O4	11	2		5.42505	12.2766	Arthropod
Organic	O4	11	3		5.74078	14.4436	Arthropod
Organic	O4	12	1		4.96577	14.9249	Arthropod
Organic	O4	12	2		5.434	12.4372	Arthropod
Organic	O4	12	2		6.15061	13.882	Arthropod
Organic	O4	13	3		5.44791	14.4436	Arthropod
Organic	O4	14	2		5.39083	14.604	Arthropod
Organic	O4	14	3		4.97022	14.5238	Arthropod
Organic	O4	15	1		4.97254	16.6085	Arthropod
Organic	O4	15	1		5.43849	13.1597	Arthropod
Organic	O4	15	1		4.94093	15.1655	Arthropod
Organic	O4	15	2		5.11589	17.0892	Arthropod
Organic	O4	15	4		5.85992	8.3383	Arthropod
Organic	O4	15	4		5.66707	10.911	Arthropod
Organic	O4	16	3		5.67673	12.2766	Arthropod
Conventional	C1	2	3		5.3529	17.0892	Arthropod
Conventional	C1	2	3		5.53272	17.2495	Arthropod
Conventional	C1	2	4		4.29165	14.0425	Arthropod
Conventional	C1	4	1		6.65359	16.7687	Arthropod
Conventional	C1	4	1		6.38576	17.4898	Arthropod
Conventional	C1	6	1		4.52383	13.6413	Arthropod
Conventional	C1	8	1		4.46762	15.0853	Arthropod
Conventional	C1	9	1		4.88627	13.24	Arthropod
Conventional	C1	9	1		6.12272	7.94408	Arthropod
Conventional	C1	10	4		4.70777	12.116	Arthropod
Conventional	C1	10	4		4.95831	13.7215	Arthropod
Conventional	C1	12	2		5.88739	12.5978	Arthropod
Conventional	C1	14	1		3.85236	15.9672	Arthropod
Conventional	C1	15	1		4.79429	12.4372	Arthropod
Conventional	C1	15	1		5.07747	12.3569	Arthropod
Conventional	C4	1	1	1	10.2764	103.308	EXCAGE LEAF
Conventional	C4	1	1	2	9.87037	100.753	EXCAGE LEAF
Conventional	C4	1	1	3	9.83716	117.778	EXCAGE LEAF
Conventional	C4	1	2	1	9.8647	91.9779	EXCAGE LEAF
Conventional	C4	1	2	2	9.45638	88.9871	EXCAGE LEAF
Conventional	C4	1	2	3	10.4301	93.5406	EXCAGE LEAF
Conventional	C4	1	3	1	8.88029	75.5478	EXCAGE LEAF
Conventional	C4	1	3	2	8.99367	78.1504	EXCAGE LEAF
Conventional	C4	1	3	3	8.93761	83.5059	EXCAGE LEAF
Conventional	C4	2	1	1	7.94881	75.6167	EXCAGE LEAF
Conventional	C4	2	1	2	9.94916	78.0477	EXCAGE LEAF
Conventional	C4	2	1	3	7.79512	89.0823	EXCAGE LEAF
Conventional	C4	3	1	1	5.86291	78.8643	EXCAGE LEAF
Conventional	C4	3	1	2	6.64898	75.3001	EXCAGE LEAF
Conventional	C4	3	1	3	6.1692	81.4907	EXCAGE LEAF
Conventional	C4	4	1	1	8.03824	81.8009	EXCAGE LEAF
Conventional	C4	4	1	2	8.20649	102.278	EXCAGE LEAF
Conventional	C4	4	1	3	8.25088	115.885	EXCAGE LEAF
Conventional	C4	6	1	1	9.55747	110.014	EXCAGE LEAF
Conventional	C4	6	1	2	8.83715	85.6438	EXCAGE LEAF
Conventional	C4	6	1	3	9.60636	96.9354	EXCAGE LEAF
Conventional	C4	6	2	1	9.74308	90.8138	EXCAGE LEAF
Conventional	C4	6	2	2	9.39808	120.925	EXCAGE LEAF
Conventional	C4	6	2	3	10.0828	82.4704	EXCAGE LEAF
Conventional	C4	7	1	1	7.85516	110.409	EXCAGE LEAF
Conventional	C4	7	1	2	7.63949	97.2945	EXCAGE LEAF
Conventional	C4	7	1	3	6.28796	89.6642	EXCAGE LEAF
Conventional	C4	8	1	1	6.49863	93.8341	EXCAGE LEAF
Conventional	C4	8	1	2	6.67334	82.5114	EXCAGE LEAF
Conventional	C4	8	1	3	6.75829	100.066	EXCAGE LEAF
Conventional	C4	9	1	1	7.23279	101.892	EXCAGE LEAF
Conventional	C4	9	1	2	7.07878	91.7165	EXCAGE LEAF
Conventional	C4	9	1	3	6.9017	95.3527	EXCAGE LEAF
Conventional	C4	11	1	1	8.57103	119.234	EXCAGE LEAF
Conventional	C4	11	1	2	8.74082	100.689	EXCAGE LEAF
Conventional	C4	11	1	3	8.41813	101.174	EXCAGE LEAF
Conventional	C4	12	1	1	8.47773	68.2159	EXCAGE LEAF
Conventional	C4	12	1	2	8.82593	77.8497	EXCAGE LEAF
Conventional	C4	12	1	3	8.73267	79.6838	EXCAGE LEAF
Conventional	C4	12	2	1	7.78874	106.039	EXCAGE LEAF
Conventional	C4	12	2	2	7.87056	98.7316	EXCAGE LEAF
Conventional	C4	12	2	3	6.52742	83.6039	EXCAGE LEAF
Conventional	C4	13	1	1	5.69423	115.257	EXCAGE LEAF
Conventional	C4	13	1	2	6.03005	83.5557	EXCAGE LEAF
Conventional	C4	13	1	3	5.95211	101.652	EXCAGE LEAF
Conventional	C4	13	2	1	6.47657	96.5274	EXCAGE LEAF
Conventional	C4	13	2	2	6.4759	95.1193	EXCAGE LEAF
Conventional	C4	13	2	3	7.51401	85.6444	EXCAGE LEAF
Conventional	C4	14	1	1	5.54405	89.7034	EXCAGE LEAF
Conventional	C4	14	1	2	4.6907	94.4807	EXCAGE LEAF
Conventional	C4	14	1	3	5.3537	98.2279	EXCAGE LEAF
Conventional	C4	15	1	1	7.29123	91.8438	EXCAGE LEAF
Conventional	C4	15	1	2	7.42543	116.183	EXCAGE LEAF
Conventional	C4	15	1	3	6.88389	105.389	EXCAGE LEAF
Conventional	C4	15	2	1	6.92019	84.0059	EXCAGE LEAF
Conventional	C4	15	2	2	6.85255	80.9141	EXCAGE LEAF
Conventional	C4	15	2	3	6.1479	96.5869	EXCAGE LEAF
Conventional	C4	16	1	1	6.22721	95.5026	EXCAGE LEAF
Conventional	C4	16	1	2	5.92734	89.7332	EXCAGE LEAF
Conventional	C4	16	1	3	6.2811	98.6771	EXCAGE LEAF
Conventional	C4	16	2	1	7.17499	98.974	EXCAGE LEAF
Conventional	C4	16	2	2	7.038	112.028	EXCAGE LEAF
Conventional	C4	16	2	3	7.03285	104.165	EXCAGE LEAF
Conventional	C4	4	2	1	8.27743	134	EXCAGE LEAF
Conventional	C4	4	2	2	8.40744	128.027	EXCAGE LEAF
Conventional	C4	4	2	3	9.03204	115.798	EXCAGE LEAF
Conventional	C4	8	2	1	7.91182	124.872	EXCAGE LEAF
Conventional	C4	8	2	2	8.74636	93.2091	EXCAGE LEAF
Conventional	C4	8	2	3	7.92216	123.667	EXCAGE LEAF
Conventional	C4	11	2	1	7.45756	90.9561	EXCAGE LEAF
Conventional	C4	11	2	2	8.10643	123.6	EXCAGE LEAF
Conventional	C4	11	2	3	8.39444	98.307	EXCAGE LEAF
Conventional	C4	12	3	1	7.94969	95.0994	EXCAGE LEAF
Conventional	C4	12	3	2	7.78966	85.4957	EXCAGE LEAF
Conventional	C4	12	3	3	9.0142	97.9435	EXCAGE LEAF
Conventional	C4	13	3	1	8.18417	94.6372	EXCAGE LEAF
Conventional	C4	13	3	2	7.57279	96.4043	EXCAGE LEAF
Conventional	C4	13	3	3	7.77997	100.689	EXCAGE LEAF
Conventional	C4	13			7.44798	101.111	EXCAGE LEAF
Conventional	C4	13			7.22785	88.826	EXCAGE LEAF
Conventional	C4	13			7.00282	103.059	EXCAGE LEAF
Organic	O4	1	1	1	3.69887	49.8475	EXCAGE LEAF
Organic	O4	1	1	2	3.42644	40.9292	EXCAGE LEAF
Organic	O4	2	1	1	3.45388	65.0774	EXCAGE LEAF
Organic	O4	2	1	2	3.24197	65.1244	EXCAGE LEAF
Organic	O4	2	1	3	3.28423	65.5352	EXCAGE LEAF
Organic	O4	3	1	1	5.0207	85.1244	EXCAGE LEAF
Organic	O4	3	1	2	5.31239	69.7432	EXCAGE LEAF
Organic	O4	3	1	3	5.26193	97.2654	EXCAGE LEAF
Organic	O4	3	2	1	4.3614	65.8543	EXCAGE LEAF
Organic	O4	3	2	2	4.66219	68.2976	EXCAGE LEAF
Organic	O4	3	2	3	4.43667	54.9271	EXCAGE LEAF
Organic	O4	3	3	1	4.43343	90.6678	EXCAGE LEAF
Organic	O4	3	3	2	4.37776	101.128	EXCAGE LEAF
Organic	O4	3	3	3	4.13638	67.0591	EXCAGE LEAF
Organic	O4	4	1	1	3.7126	55.3979	EXCAGE LEAF
Organic	O4	4	1	2	3.66791	80.5074	EXCAGE LEAF
Organic	O4	4	1	3	3.66844	76.9269	EXCAGE LEAF
Organic	O4	4	2	1	3.47037	63.2619	EXCAGE LEAF
Organic	O4	4	2	2	3.53372	64.0585	EXCAGE LEAF
Organic	O4	4	2	3	3.55413	59.8945	EXCAGE LEAF
Organic	O4	4	3	1	2.89992	65.3427	EXCAGE LEAF
Organic	O4	4	3	2	2.95271	73.5613	EXCAGE LEAF
Organic	O4	4	3	3	2.69437	67.695	EXCAGE LEAF
Organic	O4	5	1	1	5.71675	83.4703	EXCAGE LEAF
Organic	O4	5	1	2	5.83661	63.6351	EXCAGE LEAF
Organic	O4	5	1	3	5.65434	78.5318	EXCAGE LEAF
Organic	O4	6	1	1	4.99262	77.191	EXCAGE LEAF
Organic	O4	6	1	2	4.98435	74.0435	EXCAGE LEAF
Organic	O4	6	1	3	5.016	74.3351	EXCAGE LEAF
Organic	O4	6	2	1	5.52081	100.604	EXCAGE LEAF
Organic	O4	6	2	2	5.56876	102.731	EXCAGE LEAF
Organic	O4	6	2	3	4.00644	71.3584	EXCAGE LEAF
Organic	O4	6	3	1	4.98487	69.653	EXCAGE LEAF
Organic	O4	6	3	2	5.31038	58.1435	EXCAGE LEAF
Organic	O4	6	1	3	5.11013	78.0665	EXCAGE LEAF
Organic	O4	7	1	1	3.96627	54.8972	EXCAGE LEAF
Organic	O4	7	1	2	3.87929	51.8517	EXCAGE LEAF
Organic	O4	7	1	3	3.75724	59.8643	EXCAGE LEAF
Organic	O4	8	1	1	4.93872	84.4894	EXCAGE LEAF
Organic	O4	8	1	2	5.11595	79.0842	EXCAGE LEAF
Organic	O4	8	1	3	5.1217	73.7394	EXCAGE LEAF
Organic	O4	9	1	1	6.01217	100.35	EXCAGE LEAF
Organic	O4	9	1	2	6.03041	86.5871	EXCAGE LEAF
Organic	O4	9	1	3	5.9811	96.7485	EXCAGE LEAF
Organic	O4	10	1	1	4.8543	63.9787	EXCAGE LEAF
Organic	O4	10	1	2	5.04032	100.047	EXCAGE LEAF
Organic	O4	10	1	3	5.27076	99.1449	EXCAGE LEAF
Organic	O4	10	2	1	4.89702	68.2809	EXCAGE LEAF
Organic	O4	10	2	2	5.09612	72.8824	EXCAGE LEAF
Organic	O4	10	2	3	4.25177	69.4016	EXCAGE LEAF
Organic	O4	10	3	1	4.32579	64.4384	EXCAGE LEAF
Organic	O4	10	3	2	4.52698	50.6914	EXCAGE LEAF
Organic	O4	10	3	3	4.80136	66.2392	EXCAGE LEAF
Organic	O4	11	1	1	5.29654	84.4514	EXCAGE LEAF
Organic	O4	11	1	2	5.19641	92.9727	EXCAGE LEAF
Organic	O4	11	1	3	5.01646	80.7545	EXCAGE LEAF
Organic	O4	12	1	1	4.44935	81.9817	EXCAGE LEAF
Organic	O4	12	1	2	4.43939	72.4208	EXCAGE LEAF
Organic	O4	12	1	3	4.62372	74.0629	EXCAGE LEAF
Organic	O4	12	2	1	4.7496	58.7559	EXCAGE LEAF
Organic	O4	12	2	2	4.57061	67.4027	EXCAGE LEAF
Organic	O4	12	2	3	4.40752	64.4781	EXCAGE LEAF
Organic	O4	13	1	1	4.7502	68.2557	EXCAGE LEAF
Organic	O4	13	1	2	4.80267	69.8013	EXCAGE LEAF
Organic	O4	13	1	3	4.82109	59.3892	EXCAGE LEAF
Organic	O4	14	1	1	4.71763	66.6784	EXCAGE LEAF
Organic	O4	14	1	2	4.71157	58.3243	EXCAGE LEAF
Organic	O4	14	1	3	4.63628	71.9147	EXCAGE LEAF
Organic	O4	15	1	1	3.88353	71.8988	EXCAGE LEAF
Organic	O4	15	1	2	3.88389	65.7817	EXCAGE LEAF
Organic	O4	15	1	3	3.99297	79.9696	EXCAGE LEAF
Organic	O4	15	2	1	4.90833	85.3678	EXCAGE LEAF
Organic	O4	15	2	2	4.73278	90.2351	EXCAGE LEAF
Organic	O4	15	2	3	4.35909	84.4674	EXCAGE LEAF
Organic	O4	15	3	1	4.23875	64.4448	EXCAGE LEAF
Organic	O4	15	3	2	4.32681	60.5554	EXCAGE LEAF
Organic	O4	15	3	3	3.42689	69.2756	EXCAGE LEAF
Organic	O4	16	1	1	5.39262	87.376	EXCAGE LEAF
Organic	O4	16	1	2	5.58611	88.4284	EXCAGE LEAF
Organic	O4	16	1	3	5.70447	77.4147	EXCAGE LEAF
Organic	O4	18	1	1	4.98673	75.3247	EXCAGE LEAF
Organic	O4	18	1	2	4.64666	77.6639	EXCAGE LEAF
Organic	O4	18	1	3	4.74791	71.2445	EXCAGE LEAF
Conventional	C1	1	1	1	4.63183	66.8003	EXCAGE LEAF
Conventional	C1	1	1	2	4.68345	73.4076	EXCAGE LEAF
Conventional	C1	1	2	1	5.11781	52.1569	EXCAGE LEAF
Conventional	C1	1	2	2	4.74219	56.196	EXCAGE LEAF
Conventional	C1	1	2	3	4.80208	52.9399	EXCAGE LEAF
Conventional	C1	1	3	1	4.08111	92.1838	EXCAGE LEAF
Conventional	C1	1	3	2	3.97905	106.621	EXCAGE LEAF
Conventional	C1	1	3	3	3.94735	99.7605	EXCAGE LEAF
Conventional	C1	2	1	1	6.0372	69.0484	EXCAGE LEAF
Conventional	C1	2	1	2	6.17546	82.5328	EXCAGE LEAF
Conventional	C1	2	1	3	6.3695	72.9818	EXCAGE LEAF
Conventional	C1	2	2	1	5.78574	92.7056	EXCAGE LEAF
Conventional	C1	2	2	2	5.59693	84.0051	EXCAGE LEAF
Conventional	C1	2	2	3	5.56225	96.7335	EXCAGE LEAF
Conventional	C1	3	1	1	4.70102	83.2836	EXCAGE LEAF
Conventional	C1	3	1	2	4.61068	80.5332	EXCAGE LEAF
Conventional	C1	3	1	3	4.98249	76.3058	EXCAGE LEAF
Conventional	C1	4	1	1	4.19186	94.4688	EXCAGE LEAF
Conventional	C1	4	1	2	4.29414	84.6414	EXCAGE LEAF
Conventional	C1	4	1	3	4.11907	87.6554	EXCAGE LEAF
Conventional	C1	4	2	1	4.04041	99.4967	EXCAGE LEAF
Conventional	C1	4	2	2	4.18341	79.117	EXCAGE LEAF
Conventional	C1	4	2	3	4.77737	85.134	EXCAGE LEAF
Conventional	C1	5	1	1	3.47114	82.5432	EXCAGE LEAF
Conventional	C1	5	1	2	3.58214	100.373	EXCAGE LEAF
Conventional	C1	5	1	3	3.67761	120.776	EXCAGE LEAF
Conventional	C1	6	1	1	3.38424	86.2269	EXCAGE LEAF
Conventional	C1	6	1	2	3.5036	89.2835	EXCAGE LEAF
Conventional	C1	6	1	3	3.5343	114.286	EXCAGE LEAF
Conventional	C1	7	1	1	4.94556	80.1339	EXCAGE LEAF
Conventional	C1	7	1	2	3.94461	84.9151	EXCAGE LEAF
Conventional	C1	7	1	3	4.7511	90.6795	EXCAGE LEAF
Conventional	C1	8	1	1	3.73279	85.8606	EXCAGE LEAF
Conventional	C1	8	1	2	3.56538	77.2409	EXCAGE LEAF
Conventional	C1	8	1	3	3.55165	86.8579	EXCAGE LEAF
Conventional	C1	9	1	1	4.50049	71.5062	EXCAGE LEAF
Conventional	C1	9	1	2	4.85517	68.147	EXCAGE LEAF
Conventional	C1	9	1	3	4.95571	75.8189	EXCAGE LEAF
Organic	O1	1	1	1	3.90162	76.1071	EXCAGE LEAF
Organic	O1	1	1	2	3.57325	74.9075	EXCAGE LEAF
Organic	O1	1	1	3	2.53214	47.6831	EXCAGE LEAF
Organic	O1	2	1	1	7.85902	63.6769	EXCAGE LEAF
Organic	O1	2	1	2	7.90518	65.8022	EXCAGE LEAF
Organic	O1	2	1	3	6.80365	52.9269	EXCAGE LEAF
Organic	O1	2	2	1	7.6533	66.6336	EXCAGE LEAF
Organic	O1	2	2	2	7.1621	54.4672	EXCAGE LEAF
Organic	O1	2	2	3	8.23687	40.321	EXCAGE LEAF
Organic	O1	2	3	1	6.77826	62.3128	EXCAGE LEAF
Organic	O1	2	3	2	6.67848	55.8454	EXCAGE LEAF
Organic	O1	2	3	3	6.79581	54.5589	EXCAGE LEAF
Organic	O1	3	1	1	7.94152	65.3473	EXCAGE LEAF
Organic	O1	3	1	2	7.89204	62.26	EXCAGE LEAF
Organic	O1	3	1	3	4.15996	51.1445	EXCAGE LEAF
Organic	O1	3	2	1	5.32731	69.5083	EXCAGE LEAF
Organic	O1	3	2	2	5.07587	87.932	EXCAGE LEAF
Organic	O1	3	2	3	3.46225	66.1012	EXCAGE LEAF
Organic	O1	3	3	1	3.40788	68.3679	EXCAGE LEAF
Organic	O1	3	3	2	2.35209	60.7399	EXCAGE LEAF
Organic	O1	3	3	3	2.56082	62.8168	EXCAGE LEAF
Organic	O1	5	1	1	7.58576	54.4211	EXCAGE LEAF
Organic	O1	5	1	2	7.88401	55.8775	EXCAGE LEAF
Organic	O1	5	1	3	6.20847	61.7839	EXCAGE LEAF
Organic	O1	5	2	1	9.40502	55.6499	EXCAGE LEAF
Organic	O1	5	2	2	9.74152	52.6674	EXCAGE LEAF
Organic	O1	5	2	3	8.78162	57.2615	EXCAGE LEAF
Organic	O1	6	1	1	11.4613	43.9938	EXCAGE LEAF
Organic	O1	6	1	2	12.3866	44.8436	EXCAGE LEAF
Organic	O1	6	1	3	10.3752	50.4248	EXCAGE LEAF
Organic	O1	7	1	1	8.61165	61.1373	EXCAGE LEAF
Organic	O1	7	1	2	9.155	66.6624	EXCAGE LEAF
Organic	O1	7	1	3	8.71942	63.0641	EXCAGE LEAF
Organic	O1	7	2	1	9.19316	76.1351	EXCAGE LEAF
Organic	O1	7	2	2	9.39537	72.2114	EXCAGE LEAF
Organic	O1	7	2	3	9.30238	84.9363	EXCAGE LEAF
Organic	O1	7	3	1	9.18858	73.2917	EXCAGE LEAF
Organic	O1	7	3	2	8.94238	79.1271	EXCAGE LEAF
Organic	O1	7	3	3	9.73224	71.47	EXCAGE LEAF
Organic	O1	7	4	1	8.94698	73.1377	EXCAGE LEAF
Organic	O1	7	4	2	9.47083	68.1508	EXCAGE LEAF
Organic	O1	7	4	3	9.14036	62.192	EXCAGE LEAF
Organic	O1	8	1	1	9.32647	56.0482	EXCAGE LEAF
Organic	O1	8	1	2	9.36048	67.6921	EXCAGE LEAF
Organic	O1	8	1	3	6.11308	55.5608	EXCAGE LEAF
Organic	O1	8	2	1	13.9036	60.3868	EXCAGE LEAF
Organic	O1	8	2	2	13.4816	72.0826	EXCAGE LEAF
Organic	O1	8	2	3	13.1263	51.5113	EXCAGE LEAF
Organic	O1	9	1	1	10.96	51.7666	EXCAGE LEAF
Organic	O1	9	1	2	10.9888	46.1891	EXCAGE LEAF
Organic	O1	9	1	3	11.0025	57.2205	EXCAGE LEAF
Organic	O1	9	2	1	13.1193	75.2333	EXCAGE LEAF
Organic	O1	9	2	2	12.7879	73.2816	EXCAGE LEAF
Organic	O1	9	2	3	12.804	66.9477	EXCAGE LEAF
Organic	O1	9	3	1	11.7063	68.4843	EXCAGE LEAF
Organic	O1	9	3	2	11.979	63.0599	EXCAGE LEAF
Organic	O1	9	3	3	11.4966	63.9479	EXCAGE LEAF
Organic	O1	10	1	1	18.3928	102.925	EXCAGE LEAF
Organic	O1	10	1	2	17.9509	90.5002	EXCAGE LEAF
Organic	O1	10	1	3	17.5381	93.5104	EXCAGE LEAF
Organic	O1	10	2	1	15.0173	88.4727	EXCAGE LEAF
Organic	O1	10	2	2	15.3227	94.1053	EXCAGE LEAF
Organic	O1	10	2	3	13.5404	86.1913	EXCAGE LEAF
Organic	O1	10	3	1	13.6407	80.5945	EXCAGE LEAF
Organic	O1	10	3	2	14.4811	93.6294	EXCAGE LEAF
Organic	O1	10	3	3	14.4759	89.5557	EXCAGE LEAF
Organic	O1	10	4	1	10.7948	88.3405	EXCAGE LEAF
Organic	O1	10	4	2	11.3096	87.8088	EXCAGE LEAF
Organic	O1	10	4	3	9.5812	72.9365	EXCAGE LEAF

## Sheet: Season
Orchard	collection date	tree	Average of d15N
C1	2017-03-27	1	4.19205
C1	2017-03-27	3	4.09122
C1	2017-03-27	5	4.24631
C1	2017-03-27	7	3.95614
C1	2017-03-27	9	5.17118
C1	2017-07-01	1	4.49811
C1	2017-07-01	2	5.92118
C1	2017-07-01	3	4.76473
C1	2017-07-01	4	4.26771
C1	2017-07-01	5	3.57696
C1	2017-07-01	6	3.47405
C1	2017-07-01	7	4.54709
C1	2017-07-01	8	3.61661
C1	2017-07-01	9	4.77046
C3	2016-12-19	1	6.67209
C3	2016-12-19	3	6.85358
C3	2016-12-19	5	7.82791
C3	2016-12-19	7	6.71441
C3	2016-12-19	9	6.92619
C3	2017-03-20	1	5.75906
C3	2017-03-20	3	6.31055
C3	2017-03-20	5	6.44037
C3	2017-03-20	7	7.43643
C3	2017-03-20	9	6.76711
O1	2017-03-30	1	8.96099
O1	2017-03-30	3	11.8953
O1	2017-03-30	5	6.8952
O1	2017-03-30	7	7.24634
O1	2017-03-30	9	6.06242
O1	2017-07-17	1	3.33567
O1	2017-07-17	2	7.31919
O1	2017-07-17	3	4.68664
O1	2017-07-17	5	8.26773
O1	2017-07-17	6	11.4077
O1	2017-07-17	7	9.14986
O1	2017-07-17	8	10.8853
O1	2017-07-17	9	11.8716
O1	2017-07-17	10	14.3371
O3	2016-12-19	1	8.88865
O3	2016-12-19	3	9.75527
O3	2016-12-19	5	10.4358
O3	2016-12-19	7	9.63335
O3	2016-12-19	9	9.23201
O3	2017-03-20	1	9.71022
O3	2017-03-20	3	9.9901
O3	2017-03-20	5	9.51782
O3	2017-03-20	7	9.43638
O3	2017-03-20	9	9.12974
C4	2016-12-19	1	6.60542
C4	2016-12-19	3	7.45376
C4	2016-12-19	5	7.35216
C4	2016-12-19	7	6.18957
C4	2016-12-19	9	6.63753
C4	2017-03-20	1	7.88958
C4	2017-03-20	3	6.92917
C4	2017-03-20	5	6.26917
C4	2017-03-20	7	5.88326
C4	2017-03-20	9	6.2337
O4	2017-03-24	1	4.8616
O4	2017-03-24	3	3.9933
O4	2017-03-24	5	4.07325
O4	2017-03-24	7	4.71325
O4	2017-03-24	9	6.80363
O4	2017-07-01	1	3.56265
O4	2017-07-02	2	3.32669
O4	2017-07-03	3	4.66698
O4	2017-07-04	4	3.35046
O4	2017-07-05	5	5.7359
O4	2017-07-06	6	5.05493
O4	2017-07-07	7	3.8676
O4	2017-07-08	8	5.05879
O4	2017-07-09	9	6.00789
O4	2017-07-10	10	4.78493
O4	2017-07-11	11	5.1698
O4	2017-07-12	12	4.54003
O4	2017-07-13	13	4.79132
O4	2017-07-14	14	4.68849
O4	2017-07-15	15	4.19478
O4	2017-07-16	16	5.56107
O4	2017-07-17	18	4.79376

## Sheet: DATA
Orchard	collection date	Fertilization	variety	tree	excage	leaf	d15N	N Amount (ug)	Type of Material
C4	2016-12-19	Conventional	Navel	1		1	6.55721	110.963	leaf plant tissue
C4	2016-12-19	Conventional	Navel	1		2	6.65019	90.9549	leaf plant tissue
C4	2016-12-19	Conventional	Navel	1		3	6.60885	73.1998	leaf plant tissue
C4	2016-12-19	Conventional	Navel	3		1	9.14583	86.7431	leaf plant tissue
C4	2016-12-19	Conventional	Navel	3		2	6.93489	61.8112	leaf plant tissue
C4	2016-12-19	Conventional	Navel	3		3	6.28056	64.2438	leaf plant tissue
C4	2016-12-19	Conventional	Navel	5		1	7.88605	101.793	leaf plant tissue
C4	2016-12-19	Conventional	Navel	5		2	6.8509	69.8744	leaf plant tissue
C4	2016-12-19	Conventional	Navel	5		3	7.31952	114.017	leaf plant tissue
C4	2016-12-19	Conventional	Navel	7		1	6.77367	82.2738	leaf plant tissue
C4	2016-12-19	Conventional	Navel	7		2	5.84743	77.5463	leaf plant tissue
C4	2016-12-19	Conventional	Navel	7		3	5.94761	98.3521	leaf plant tissue
C4	2016-12-19	Conventional	Navel	9		1	6.76496	90.5721	leaf plant tissue
C4	2016-12-19	Conventional	Navel	9		2	6.56929	82.9124	leaf plant tissue
C4	2016-12-19	Conventional	Navel	9		3	6.57836	74.6063	leaf plant tissue
C8	2017-03-27	Conventional	Valencia	7		1	1.95868	90.474	leaf plant tissue
C8	2017-03-27	Conventional	Valencia	7		2	2.24167	119.964	leaf plant tissue
C8	2017-03-27	Conventional	Valencia	7		3	2.06872	95.6907	leaf plant tissue
C8	2017-03-27	Conventional	Valencia	9		1	2.57624	119.671	leaf plant tissue
C8	2017-03-27	Conventional	Valencia	9		2	2.37562	89.2823	leaf plant tissue
C8	2017-03-27	Conventional	Valencia	9		3	3.11625	108.474	leaf plant tissue
C5	2017-03-24	Conventional	Navel	1		1	7.53274	144.555	leaf plant tissue
C5	2017-03-24	Conventional	Navel	1		2	7.95694	149.271	leaf plant tissue
C5	2017-03-24	Conventional	Navel	1		3	8.33441	98.3106	leaf plant tissue
C5	2017-03-24	Conventional	Navel	3		1	5.76961	101.058	leaf plant tissue
C5	2017-03-24	Conventional	Navel	3		2	6.69717	107.694	leaf plant tissue
C5	2017-03-24	Conventional	Navel	3		3	7.23693	97.4893	leaf plant tissue
C5	2017-03-24	Conventional	Navel	5		1	5.01072	188.369	leaf plant tissue
C5	2017-03-24	Conventional	Navel	5		2	4.30819	98.0079	leaf plant tissue
C5	2017-03-24	Conventional	Navel	5		3	4.1995	93.3853	leaf plant tissue
C5	2017-03-24	Conventional	Navel	7		1	6.50376	121.496	leaf plant tissue
C5	2017-03-24	Conventional	Navel	7		2	6.12596	104.089	leaf plant tissue
C5	2017-03-24	Conventional	Navel	7		3	6.06149	117.54	leaf plant tissue
C5	2017-03-24	Conventional	Navel	9		1	5.1721	120.909	leaf plant tissue
C5	2017-03-24	Conventional	Navel	9		2	4.78919	119.407	leaf plant tissue
C5	2017-03-24	Conventional	Navel	9		3	4.74805	124.163	leaf plant tissue
O4	2017-03-24	Organic	Navel	1		1	6.27709	117.187	leaf plant tissue
O4	2017-03-24	Organic	Navel	1		2	4.16373	95.6467	leaf plant tissue
O4	2017-03-24	Organic	Navel	1		3	4.14398	127.044	leaf plant tissue
O4	2017-03-24	Organic	Navel	3		1	3.73776	102.826	leaf plant tissue
O4	2017-03-24	Organic	Navel	3		2	4.17378	77.2333	leaf plant tissue
O4	2017-03-24	Organic	Navel	3		3	4.06835	87.6762	leaf plant tissue
O4	2017-03-24	Organic	Navel	5		1	4.84171	77.0983	leaf plant tissue
O4	2017-03-24	Organic	Navel	5		2	2.93901	85.4636	leaf plant tissue
O4	2017-03-24	Organic	Navel	5		3	4.43903	76.5123	leaf plant tissue
O4	2017-03-24	Organic	Navel	7		1	4.96369	102.253	leaf plant tissue
O4	2017-03-24	Organic	Navel	7		2	4.46477	115.458	leaf plant tissue
O4	2017-03-24	Organic	Navel	7		3	4.71129	104.865	leaf plant tissue
O4	2017-03-24	Organic	Navel	9		1	8.08402	115.92	leaf plant tissue
O4	2017-03-24	Organic	Navel	9		2	6.71339	107.505	leaf plant tissue
O4	2017-03-24	Organic	Navel	9		3	5.61348	105.585	leaf plant tissue
O1	2017-03-30	Organic	Navel	1		1	10.7283	76.223	leaf plant tissue
O1	2017-03-30	Organic	Navel	1		2	11.1411	80.2613	leaf plant tissue
O1	2017-03-30	Organic	Navel	1		3	5.01356	72.4153	leaf plant tissue
O1	2017-03-30	Organic	Navel	3		1	6.26794	70.2611	leaf plant tissue
O1	2017-03-30	Organic	Navel	3		2	16.5466	82.0658	leaf plant tissue
O1	2017-03-30	Organic	Navel	3		3	12.8715	60.1752	leaf plant tissue
O1	2017-03-30	Organic	Navel	5		1	7.25083	67.8622	leaf plant tissue
O1	2017-03-30	Organic	Navel	5		2	6.85441	55.6637	leaf plant tissue
O1	2017-03-30	Organic	Navel	5		3	6.58036	77.0469	leaf plant tissue
O1	2017-03-30	Organic	Navel	7		1	7.00246	52.1885	leaf plant tissue
O1	2017-03-30	Organic	Navel	7		2	6.15103	57.692	leaf plant tissue
O1	2017-03-30	Organic	Navel	7		3	8.58555	58.8233	leaf plant tissue
O1	2017-03-30	Organic	Navel	9		1	5.69658	77.739	leaf plant tissue
O1	2017-03-30	Organic	Navel	9		2	7.28485	74.4886	leaf plant tissue
O1	2017-03-30	Organic	Navel	9		3	5.20583	71.6537	leaf plant tissue
O2	2017-03-30	Organic	Navel	1		1	13.2658	98.1984	leaf plant tissue
O2	2017-03-30	Organic	Navel	1		2	16.2825	110.481	leaf plant tissue
O2	2017-03-30	Organic	Navel	1		3	13.1585	119.996	leaf plant tissue
O2	2017-03-30	Organic	Navel	3		1	15.6767	112.903	leaf plant tissue
O2	2017-03-30	Organic	Navel	3		2	15.4993	101.635	leaf plant tissue
O2	2017-03-30	Organic	Navel	3		3	17.8879	120.453	leaf plant tissue
O2	2017-03-30	Organic	Navel	5		1	17.2257	86.5378	leaf plant tissue
O2	2017-03-30	Organic	Navel	5		2	17.1244	115.607	leaf plant tissue
O2	2017-03-30	Organic	Navel	5		3	19.2207	138.133	leaf plant tissue
O2	2017-03-30	Organic	Navel	7		1	16.18	140.946	leaf plant tissue
O2	2017-03-30	Organic	Navel	7		2	18.8992	134.919	leaf plant tissue
O2	2017-03-30	Organic	Navel	7		3	17.196	119.923	leaf plant tissue
O2	2017-03-30	Organic	Navel	9		1	20.103	131.985	leaf plant tissue
O2	2017-03-30	Organic	Navel	9		2	20.0001	145.828	leaf plant tissue
O2	2017-03-30	Organic	Navel	9		3	15.2741	137.919	leaf plant tissue
O3	2017-03-20	Organic	Navel	1		1	9.55366	179.363	leaf plant tissue
O3	2017-03-20	Organic	Navel	1		2	9.20139	154.795	leaf plant tissue
O3	2017-03-20	Organic	Navel	1		3	10.3756	103.39	leaf plant tissue
O3	2017-03-20	Organic	Navel	3		1	10.599	148.316	leaf plant tissue
O3	2017-03-20	Organic	Navel	3		2	9.36736	146.432	leaf plant tissue
O3	2017-03-20	Organic	Navel	3		3	10.0039	149.861	leaf plant tissue
O3	2017-03-20	Organic	Navel	5		1	9.91163	112.703	leaf plant tissue
O3	2017-03-20	Organic	Navel	5		2	8.87349	150.496	leaf plant tissue
O3	2017-03-20	Organic	Navel	5		3	9.76834	122.904	leaf plant tissue
O3	2017-03-20	Organic	Navel	7		1	8.83328	160.364	leaf plant tissue
O3	2017-03-20	Organic	Navel	7		2	8.54052	177.58	leaf plant tissue
O3	2017-03-20	Organic	Navel	7		3	10.9353	167.598	leaf plant tissue
O3	2017-03-20	Organic	Navel	9		1	9.18671	115.578	leaf plant tissue
O3	2017-03-20	Organic	Navel	9		2	9.15492	122.759	leaf plant tissue
O3	2017-03-20	Organic	Navel	9		3	9.04757	111.827	leaf plant tissue
C2	2017-03-27	Conventional	Navel	1		1	7.20105	103.987	leaf plant tissue
C2	2017-03-27	Conventional	Navel	1		2	9.12137	120.074	leaf plant tissue
C2	2017-03-27	Conventional	Navel	1		3	8.17283	126.636	leaf plant tissue
C2	2017-03-27	Conventional	Navel	3		1	7.87117	145.354	leaf plant tissue
C2	2017-03-27	Conventional	Navel	3		2	6.85202	138.405	leaf plant tissue
C2	2017-03-27	Conventional	Navel	3		3	8.5309	141.194	leaf plant tissue
C2	2017-03-27	Conventional	Navel	5		1	7.81571	160.531	leaf plant tissue
C2	2017-03-27	Conventional	Navel	5		2	8.39343	164.559	leaf plant tissue
C2	2017-03-27	Conventional	Navel	5		3	8.55778	177.304	leaf plant tissue
C2	2017-03-27	Conventional	Navel	7		1	9.72969	158.939	leaf plant tissue
C2	2017-03-27	Conventional	Navel	7		2	8.78122	115.217	leaf plant tissue
C2	2017-03-27	Conventional	Navel	7		3	8.71198	113.324	leaf plant tissue
C2	2017-03-27	Conventional	Navel	9		1	6.93812	138.923	leaf plant tissue
C2	2017-03-27	Conventional	Navel	9		2	6.87878	133.613	leaf plant tissue
C2	2017-03-27	Conventional	Navel	9		3	6.39501	136.244	leaf plant tissue
C1	2017-03-27	Conventional	Navel	1		1	3.89132	110.245	leaf plant tissue
C1	2017-03-27	Conventional	Navel	1		2	4.30583	137.372	leaf plant tissue
C1	2017-03-27	Conventional	Navel	1		3	4.379	107.462	leaf plant tissue
C1	2017-03-27	Conventional	Navel	3		1	4.1366	126.701	leaf plant tissue
C1	2017-03-27	Conventional	Navel	3		2	4.43175	164.413	leaf plant tissue
C1	2017-03-27	Conventional	Navel	3		3	3.7053	163.58	leaf plant tissue
C1	2017-03-27	Conventional	Navel	5		1	4.13218	95.9057	leaf plant tissue
C1	2017-03-27	Conventional	Navel	5		2	3.87848	147.725	leaf plant tissue
C1	2017-03-27	Conventional	Navel	5		3	4.72828	129.077	leaf plant tissue
C1	2017-03-27	Conventional	Navel	7		1	3.87493	95.1715	leaf plant tissue
C1	2017-03-27	Conventional	Navel	7		2	4.17726	157.731	leaf plant tissue
C1	2017-03-27	Conventional	Navel	7		3	3.81622	96.1303	leaf plant tissue
C1	2017-03-27	Conventional	Navel	9		1	4.41211	109.336	leaf plant tissue
C1	2017-03-27	Conventional	Navel	9		2	5.53483	107.507	leaf plant tissue
C1	2017-03-27	Conventional	Navel	9		3	5.5666	101.875	leaf plant tissue
C3	2017-03-20	Conventional	Navel	1		1	5.40469	116.844	leaf plant tissue
C3	2017-03-20	Conventional	Navel	1		2	5.69853	118.806	leaf plant tissue
C3	2017-03-20	Conventional	Navel	1		3	6.17395	129.564	leaf plant tissue
C3	2017-03-20	Conventional	Navel	3		1	7.60963	141.627	leaf plant tissue
C3	2017-03-20	Conventional	Navel	3		2	6.1455	148.984	leaf plant tissue
C3	2017-03-20	Conventional	Navel	3		3	5.17653	118.925	leaf plant tissue
C3	2017-03-20	Conventional	Navel	5		1	6.49342	116.469	leaf plant tissue
C3	2017-03-20	Conventional	Navel	5		2	6.524	127.786	leaf plant tissue
C3	2017-03-20	Conventional	Navel	5		3	6.30371	105.319	leaf plant tissue
C3	2017-03-20	Conventional	Navel	7		1	6.50635	107.114	leaf plant tissue
C3	2017-03-20	Conventional	Navel	7		2	7.60901	100.937	leaf plant tissue
C3	2017-03-20	Conventional	Navel	7		3	8.19394	132.583	leaf plant tissue
C3	2017-03-20	Conventional	Navel	9		1	6.49711	127.374	leaf plant tissue
C3	2017-03-20	Conventional	Navel	9		2	6.21469	135.399	leaf plant tissue
C3	2017-03-20	Conventional	Navel	9		3	7.58952	138.361	leaf plant tissue
C7	2017-03-27	Conventional	Valencia	1		1	3.25639	108.306	leaf plant tissue
C7	2017-03-27	Conventional	Valencia	1		2	3.86341	106.207	leaf plant tissue
C7	2017-03-27	Conventional	Valencia	1		3	2.98476	107.43	leaf plant tissue
C7	2017-03-27	Conventional	Valencia	3		1	4.08844	126.119	leaf plant tissue
C7	2017-03-27	Conventional	Valencia	3		2	3.46234	126.768	leaf plant tissue
C7	2017-03-27	Conventional	Valencia	3		3	3.17966	133.826	leaf plant tissue
C7	2017-03-27	Conventional	Valencia	5		1	3.82685	146.79	leaf plant tissue
C7	2017-03-27	Conventional	Valencia	5		2	4.3023	151.917	leaf plant tissue
C7	2017-03-27	Conventional	Valencia	5		3	4.38329	126.675	leaf plant tissue
C7	2017-03-27	Conventional	Valencia	7		1	3.44409	153.085	leaf plant tissue
C7	2017-03-27	Conventional	Valencia	7		2	2.81761	129.25	leaf plant tissue
C7	2017-03-27	Conventional	Valencia	7		3	4.26277	140.186	leaf plant tissue
C7	2017-03-27	Conventional	Valencia	9		1	3.87958	117.251	leaf plant tissue
C7	2017-03-27	Conventional	Valencia	9		2	3.98034	141.212	leaf plant tissue
C7	2017-03-27	Conventional	Valencia	9		3	3.26367	156.813	leaf plant tissue
C4	2017-03-20	Conventional	Navel	1		1	7.83258	104.025	leaf plant tissue
C4	2017-03-20	Conventional	Navel	1		2	7.38757	110.391	leaf plant tissue
C4	2017-03-20	Conventional	Navel	1		3	8.44859	111.253	leaf plant tissue
C4	2017-03-20	Conventional	Navel	3		1	6.73337	87.6729	leaf plant tissue
C4	2017-03-20	Conventional	Navel	3		2	6.00635	84.5458	leaf plant tissue
C4	2017-03-20	Conventional	Navel	3		3	8.0478	82.7036	leaf plant tissue
C4	2017-03-20	Conventional	Navel	5		1	6.46767	122.517	leaf plant tissue
C4	2017-03-20	Conventional	Navel	5		2	5.77075	116.575	leaf plant tissue
C4	2017-03-20	Conventional	Navel	5		3	6.5691	115.085	leaf plant tissue
C4	2017-03-20	Conventional	Navel	7		1	5.77155	105.198	leaf plant tissue
C4	2017-03-20	Conventional	Navel	7		2	6.02525	94.3327	leaf plant tissue
C4	2017-03-20	Conventional	Navel	7		3	5.85298	98.0617	leaf plant tissue
C4	2017-03-20	Conventional	Navel	9		1	7.47965	95.5794	leaf plant tissue
C4	2017-03-20	Conventional	Navel	9		2	5.0872	77.7695	leaf plant tissue
C4	2017-03-20	Conventional	Navel	9		3	6.13424	107.21	leaf plant tissue
C6	2017-03-27	Conventional	Valencia	1		1	6.24545	104.189	leaf plant tissue
C6	2017-03-27	Conventional	Valencia	1		2	6.29642	97.666	leaf plant tissue
C6	2017-03-27	Conventional	Valencia	1		3	6.22431	109.978	leaf plant tissue
C6	2017-03-27	Conventional	Valencia	3		1	6.46554	137.202	leaf plant tissue
C6	2017-03-27	Conventional	Valencia	3		2	7.11266	114.661	leaf plant tissue
C6	2017-03-27	Conventional	Valencia	3		3	6.41458	146.42	leaf plant tissue
C6	2017-03-27	Conventional	Valencia	5		1	6.53054	75.7558	leaf plant tissue
C6	2017-03-27	Conventional	Valencia	5		2	5.6765	121.843	leaf plant tissue
C6	2017-03-27	Conventional	Valencia	5		3	6.61557	139.88	leaf plant tissue
C6	2017-03-27	Conventional	Valencia	7		1	4.56579	93.735	leaf plant tissue
C6	2017-03-27	Conventional	Valencia	7		2	5.97804	115.412	leaf plant tissue
C6	2017-03-27	Conventional	Valencia	7		3	5.79097	71.4464	leaf plant tissue
C6	2017-03-27	Conventional	Valencia	9		1	4.27107	96.8586	leaf plant tissue
C6	2017-03-27	Conventional	Valencia	9		2	3.90727	93.0178	leaf plant tissue
C6	2017-03-27	Conventional	Valencia	9		3	3.55043	132.626	leaf plant tissue
C8	2017-03-27	Conventional	Valencia	1		1	2.42416	71.5815	leaf plant tissue
C8	2017-03-27	Conventional	Valencia	1		2	3.05423	138.994	leaf plant tissue
C8	2017-03-27	Conventional	Valencia	1		3	2.65991	121.837	leaf plant tissue
C8	2017-03-27	Conventional	Valencia	3		1	1.21487	112.975	leaf plant tissue
C8	2017-03-27	Conventional	Valencia	3		2	2.00045	57.027	leaf plant tissue
C8	2017-03-27	Conventional	Valencia	3		3	1.49581	141.316	leaf plant tissue
C8	2017-03-27	Conventional	Valencia	5		1	2.32519	104.577	leaf plant tissue
C8	2017-03-27	Conventional	Valencia	5		2	2.13088	113.222	leaf plant tissue
C8	2017-03-27	Conventional	Valencia	5		3	2.69586	117.523	leaf plant tissue
O3	2016-12-19	Organic	Navel	1		1	10.2859	74.6886	leaf plant tissue
O3	2016-12-19	Organic	Navel	1		2	8.32767	79.3576	leaf plant tissue
O3	2016-12-19	Organic	Navel	1		3	8.05243	52.6599	leaf plant tissue
O3	2016-12-19	Organic	Navel	3		1	8.58973	25.4658	leaf plant tissue
O3	2016-12-19	Organic	Navel	3		2	8.99745	13.2933	leaf plant tissue
O3	2016-12-19	Organic	Navel	3		3	11.6786	65.271	leaf plant tissue
O3	2016-12-19	Organic	Navel	5		1	9.23264	62.5245	leaf plant tissue
O3	2016-12-19	Organic	Navel	5		2	10.4213	49.0718	leaf plant tissue
O3	2016-12-19	Organic	Navel	5		3	11.6535	90.5052	leaf plant tissue
O3	2016-12-19	Organic	Navel	7		1	8.38205	72.4863	leaf plant tissue
O3	2016-12-19	Organic	Navel	7		2	10.8417	80.9285	leaf plant tissue
O3	2016-12-19	Organic	Navel	7		3	9.67629	56.3308	leaf plant tissue
O3	2016-12-19	Organic	Navel	9		1	6.9939	50.2076	leaf plant tissue
O3	2016-12-19	Organic	Navel	9		2	10.1377	49.5726	leaf plant tissue
O3	2016-12-19	Organic	Navel	9		3	10.5644	46.7825	leaf plant tissue
C3	2016-12-19	Conventional	Navel	1		1	6.14853	68.1048	leaf plant tissue
C3	2016-12-19	Conventional	Navel	1		2	6.09541	71.3467	leaf plant tissue
C3	2016-12-19	Conventional	Navel	1		3	7.77233	65.9119	leaf plant tissue
C3	2016-12-19	Conventional	Navel	3		1	8.25651	86.0718	leaf plant tissue
C3	2016-12-19	Conventional	Navel	3		2	5.69028	59.6063	leaf plant tissue
C3	2016-12-19	Conventional	Navel	3		3	6.61395	78.5639	leaf plant tissue
C3	2016-12-19	Conventional	Navel	5		1	7.51035	65.0266	leaf plant tissue
C3	2016-12-19	Conventional	Navel	5		2	9.16307	91.6411	leaf plant tissue
C3	2016-12-19	Conventional	Navel	5		3	6.8103	95.5371	leaf plant tissue
C3	2016-12-19	Conventional	Navel	7		1	5.9878	91.5699	leaf plant tissue
C3	2016-12-19	Conventional	Navel	7		2	7.08051	134.345	leaf plant tissue
C3	2016-12-19	Conventional	Navel	7		3	7.07493	88.0035	leaf plant tissue
C3	2016-12-19	Conventional	Navel	9		1	7.42092	66.0654	leaf plant tissue
C3	2016-12-19	Conventional	Navel	9		2	6.99585	55.082	leaf plant tissue
C3	2016-12-19	Conventional	Navel	9		3	6.3618	83.8098	leaf plant tissue
O4	2017-10-01	Organic	Navel	1	1	1	3.69887	49.8475	EXCAGE LEAF
O4	2017-10-01	Organic	Navel	1	1	2	3.42644	40.9292	EXCAGE LEAF
O4	2017-10-01	Organic	Navel	2	1	1	3.45388	65.0774	EXCAGE LEAF
O4	2017-10-01	Organic	Navel	2	1	2	3.24197	65.1244	EXCAGE LEAF
O4	2017-10-01	Organic	Navel	2	1	3	3.28423	65.5352	EXCAGE LEAF
O4	2017-10-01	Organic	Navel	3	1	1	5.0207	85.1244	EXCAGE LEAF
O4	2017-10-01	Organic	Navel	3	1	2	5.31239	69.7432	EXCAGE LEAF
O4	2017-10-01	Organic	Navel	3	1	3	5.26193	97.2654	EXCAGE LEAF
O4	2017-10-01	Organic	Navel	3	2	1	4.3614	65.8543	EXCAGE LEAF
O4	2017-10-01	Organic	Navel	3	2	2	4.66219	68.2976	EXCAGE LEAF
O4	2017-10-01	Organic	Navel	3	2	3	4.43667	54.9271	EXCAGE LEAF
O4	2017-10-01	Organic	Navel	3	3	1	4.43343	90.6678	EXCAGE LEAF
O4	2017-10-01	Organic	Navel	3	3	2	4.37776	101.128	EXCAGE LEAF
O4	2017-10-01	Organic	Navel	3	3	3	4.13638	67.0591	EXCAGE LEAF
O4	2017-10-01	Organic	Navel	4	1	1	3.7126	55.3979	EXCAGE LEAF
O4	2017-10-01	Organic	Navel	4	1	2	3.66791	80.5074	EXCAGE LEAF
O4	2017-10-01	Organic	Navel	4	1	3	3.66844	76.9269	EXCAGE LEAF
O4	2017-10-01	Organic	Navel	4	2	1	3.47037	63.2619	EXCAGE LEAF
O4	2017-10-01	Organic	Navel	4	2	2	3.53372	64.0585	EXCAGE LEAF
O4	2017-10-01	Organic	Navel	4	2	3	3.55413	59.8945	EXCAGE LEAF
O4	2017-10-01	Organic	Navel	4	3	1	2.89992	65.3427	EXCAGE LEAF
O4	2017-10-01	Organic	Navel	4	3	2	2.95271	73.5613	EXCAGE LEAF
O4	2017-10-01	Organic	Navel	4	3	3	2.69437	67.695	EXCAGE LEAF
O4	2017-10-01	Organic	Navel	5	1	1	5.71675	83.4703	EXCAGE LEAF
O4	2017-10-01	Organic	Navel	5	1	2	5.83661	63.6351	EXCAGE LEAF
O4	2017-10-01	Organic	Navel	5	1	3	5.65434	78.5318	EXCAGE LEAF
O4	2017-10-01	Organic	Navel	6	1	1	4.99262	77.191	EXCAGE LEAF
O4	2017-10-01	Organic	Navel	6	1	2	4.98435	74.0435	EXCAGE LEAF
O4	2017-10-01	Organic	Navel	6	1	3	5.016	74.3351	EXCAGE LEAF
O4	2017-10-01	Organic	Navel	6	2	1	5.52081	100.604	EXCAGE LEAF
O4	2017-10-01	Organic	Navel	6	2	2	5.56876	102.731	EXCAGE LEAF
O4	2017-10-01	Organic	Navel	6	2	3	4.00644	71.3584	EXCAGE LEAF
O4	2017-10-01	Organic	Navel	6	3	1	4.98487	69.653	EXCAGE LEAF
O4	2017-10-01	Organic	Navel	6	3	2	5.31038	58.1435	EXCAGE LEAF
O4	2017-10-01	Organic	Navel	6	3	3	5.11013	78.0665	EXCAGE LEAF
O4	2017-10-01	Organic	Navel	7	1	1	3.96627	54.8972	EXCAGE LEAF
O4	2017-10-01	Organic	Navel	7	1	2	3.87929	51.8517	EXCAGE LEAF
O4	2017-10-01	Organic	Navel	7	1	3	3.75724	59.8643	EXCAGE LEAF
O4	2017-10-01	Organic	Navel	8	1	1	4.93872	84.4894	EXCAGE LEAF
O4	2017-10-01	Organic	Navel	8	1	2	5.11595	79.0842	EXCAGE LEAF
O4	2017-10-01	Organic	Navel	8	1	3	5.1217	73.7394	EXCAGE LEAF
O4	2017-10-01	Organic	Navel	9	1	1	6.01217	100.35	EXCAGE LEAF
O4	2017-10-01	Organic	Navel	9	1	2	6.03041	86.5871	EXCAGE LEAF
O4	2017-10-01	Organic	Navel	9	1	3	5.9811	96.7485	EXCAGE LEAF
O4	2017-10-01	Organic	Navel	10	1	1	4.8543	63.9787	EXCAGE LEAF
O4	2017-10-01	Organic	Navel	10	1	2	5.04032	100.047	EXCAGE LEAF
O4	2017-10-01	Organic	Navel	10	1	3	5.27076	99.1449	EXCAGE LEAF
O4	2017-10-01	Organic	Navel	10	2	1	4.89702	68.2809	EXCAGE LEAF
O4	2017-10-01	Organic	Navel	10	2	2	5.09612	72.8824	EXCAGE LEAF
O4	2017-10-01	Organic	Navel	10	2	3	4.25177	69.4016	EXCAGE LEAF
O4	2017-10-01	Organic	Navel	10	3	1	4.32579	64.4384	EXCAGE LEAF
O4	2017-10-01	Organic	Navel	10	3	2	4.52698	50.6914	EXCAGE LEAF
O4	2017-10-01	Organic	Navel	10	3	3	4.80136	66.2392	EXCAGE LEAF
O4	2017-10-01	Organic	Navel	11	1	1	5.29654	84.4514	EXCAGE LEAF
O4	2017-10-01	Organic	Navel	11	1	2	5.19641	92.9727	EXCAGE LEAF
O4	2017-10-01	Organic	Navel	11	1	3	5.01646	80.7545	EXCAGE LEAF
O4	2017-10-01	Organic	Navel	12	1	1	4.44935	81.9817	EXCAGE LEAF
O4	2017-10-01	Organic	Navel	12	1	2	4.43939	72.4208	EXCAGE LEAF
O4	2017-10-01	Organic	Navel	12	1	3	4.62372	74.0629	EXCAGE LEAF
O4	2017-10-01	Organic	Navel	12	2	1	4.7496	58.7559	EXCAGE LEAF
O4	2017-10-01	Organic	Navel	12	2	2	4.57061	67.4027	EXCAGE LEAF
O4	2017-10-01	Organic	Navel	12	2	3	4.40752	64.4781	EXCAGE LEAF
O4	2017-10-01	Organic	Navel	13	1	1	4.7502	68.2557	EXCAGE LEAF
O4	2017-10-01	Organic	Navel	13	1	2	4.80267	69.8013	EXCAGE LEAF
O4	2017-10-01	Organic	Navel	13	1	3	4.82109	59.3892	EXCAGE LEAF
O4	2017-10-01	Organic	Navel	14	1	1	4.71763	66.6784	EXCAGE LEAF
O4	2017-10-01	Organic	Navel	14	1	2	4.71157	58.3243	EXCAGE LEAF
O4	2017-10-01	Organic	Navel	14	1	3	4.63628	71.9147	EXCAGE LEAF
O4	2017-10-01	Organic	Navel	15	1	1	3.88353	71.8988	EXCAGE LEAF
O4	2017-10-01	Organic	Navel	15	1	2	3.88389	65.7817	EXCAGE LEAF
O4	2017-10-01	Organic	Navel	15	1	3	3.99297	79.9696	EXCAGE LEAF
O4	2017-10-01	Organic	Navel	15	2	1	4.90833	85.3678	EXCAGE LEAF
O4	2017-10-01	Organic	Navel	15	2	2	4.73278	90.2351	EXCAGE LEAF
O4	2017-10-01	Organic	Navel	15	2	3	4.35909	84.4674	EXCAGE LEAF
O4	2017-10-01	Organic	Navel	15	3	1	4.23875	64.4448	EXCAGE LEAF
O4	2017-10-01	Organic	Navel	15	3	2	4.32681	60.5554	EXCAGE LEAF
O4	2017-10-01	Organic	Navel	15	3	3	3.42689	69.2756	EXCAGE LEAF
O4	2017-10-01	Organic	Navel	16	1	1	5.39262	87.376	EXCAGE LEAF
O4	2017-10-01	Organic	Navel	16	1	2	5.58611	88.4284	EXCAGE LEAF
O4	2017-10-01	Organic	Navel	16	1	3	5.70447	77.4147	EXCAGE LEAF
O4	2017-10-01	Organic	Navel	18	1	1	4.98673	75.3247	EXCAGE LEAF
O4	2017-10-01	Organic	Navel	18	1	2	4.64666	77.6639	EXCAGE LEAF
O4	2017-10-01	Organic	Navel	18	1	3	4.74791	71.2445	EXCAGE LEAF
C1	2017-07-01	Conventional	Navel	1	1	1	4.63183	66.8003	EXCAGE LEAF
C1	2017-07-01	Conventional	Navel	1	1	2	4.68345	73.4076	EXCAGE LEAF
C1	2017-07-01	Conventional	Navel	1	2	1	5.11781	52.1569	EXCAGE LEAF
C1	2017-07-01	Conventional	Navel	1	2	2	4.74219	56.196	EXCAGE LEAF
C1	2017-07-01	Conventional	Navel	1	2	3	4.80208	52.9399	EXCAGE LEAF
C1	2017-07-01	Conventional	Navel	1	3	1	4.08111	92.1838	EXCAGE LEAF
C1	2017-07-01	Conventional	Navel	1	3	2	3.97905	106.621	EXCAGE LEAF
C1	2017-07-01	Conventional	Navel	1	3	3	3.94735	99.7605	EXCAGE LEAF
C1	2017-07-01	Conventional	Navel	2	1	1	6.0372	69.0484	EXCAGE LEAF
C1	2017-07-01	Conventional	Navel	2	1	2	6.17546	82.5328	EXCAGE LEAF
C1	2017-07-01	Conventional	Navel	2	1	3	6.3695	72.9818	EXCAGE LEAF
C1	2017-07-01	Conventional	Navel	2	2	1	5.78574	92.7056	EXCAGE LEAF
C1	2017-07-01	Conventional	Navel	2	2	2	5.59693	84.0051	EXCAGE LEAF
C1	2017-07-01	Conventional	Navel	2	2	3	5.56225	96.7335	EXCAGE LEAF
C1	2017-07-01	Conventional	Navel	3	1	1	4.70102	83.2836	EXCAGE LEAF
C1	2017-07-01	Conventional	Navel	3	1	2	4.61068	80.5332	EXCAGE LEAF
C1	2017-07-01	Conventional	Navel	3	1	3	4.98249	76.3058	EXCAGE LEAF
C1	2017-07-01	Conventional	Navel	4	1	1	4.19186	94.4688	EXCAGE LEAF
C1	2017-07-01	Conventional	Navel	4	1	2	4.29414	84.6414	EXCAGE LEAF
C1	2017-07-01	Conventional	Navel	4	1	3	4.11907	87.6554	EXCAGE LEAF
C1	2017-07-01	Conventional	Navel	4	2	1	4.04041	99.4967	EXCAGE LEAF
C1	2017-07-01	Conventional	Navel	4	2	2	4.18341	79.117	EXCAGE LEAF
C1	2017-07-01	Conventional	Navel	4	2	3	4.77737	85.134	EXCAGE LEAF
C1	2017-07-01	Conventional	Navel	5	1	1	3.47114	82.5432	EXCAGE LEAF
C1	2017-07-01	Conventional	Navel	5	1	2	3.58214	100.373	EXCAGE LEAF
C1	2017-07-01	Conventional	Navel	5	1	3	3.67761	120.776	EXCAGE LEAF
C1	2017-07-01	Conventional	Navel	6	1	1	3.38424	86.2269	EXCAGE LEAF
C1	2017-07-01	Conventional	Navel	6	1	2	3.5036	89.2835	EXCAGE LEAF
C1	2017-07-01	Conventional	Navel	6	1	3	3.5343	114.286	EXCAGE LEAF
C1	2017-07-01	Conventional	Navel	7	1	1	4.94556	80.1339	EXCAGE LEAF
C1	2017-07-01	Conventional	Navel	7	1	2	3.94461	84.9151	EXCAGE LEAF
C1	2017-07-01	Conventional	Navel	7	1	3	4.7511	90.6795	EXCAGE LEAF
C1	2017-07-01	Conventional	Navel	8	1	1	3.73279	85.8606	EXCAGE LEAF
C1	2017-07-01	Conventional	Navel	8	1	2	3.56538	77.2409	EXCAGE LEAF
C1	2017-07-01	Conventional	Navel	8	1	3	3.55165	86.8579	EXCAGE LEAF
C1	2017-07-01	Conventional	Navel	9	1	1	4.50049	71.5062	EXCAGE LEAF
C1	2017-07-01	Conventional	Navel	9	1	2	4.85517	68.147	EXCAGE LEAF
C1	2017-07-01	Conventional	Navel	9	1	3	4.95571	75.8189	EXCAGE LEAF
O1	2017-07-17	Organic	Navel	1	1	1	3.90162	76.1071	EXCAGE LEAF
O1	2017-07-17	Organic	Navel	1	1	2	3.57325	74.9075	EXCAGE LEAF
O1	2017-07-17	Organic	Navel	1	1	3	2.53214	47.6831	EXCAGE LEAF
O1	2017-07-17	Organic	Navel	2	1	1	7.85902	63.6769	EXCAGE LEAF
O1	2017-07-17	Organic	Navel	2	1	2	7.90518	65.8022	EXCAGE LEAF
O1	2017-07-17	Organic	Navel	2	1	3	6.80365	52.9269	EXCAGE LEAF
O1	2017-07-17	Organic	Navel	2	2	1	7.6533	66.6336	EXCAGE LEAF
O1	2017-07-17	Organic	Navel	2	2	2	7.1621	54.4672	EXCAGE LEAF
O1	2017-07-17	Organic	Navel	2	2	3	8.23687	40.321	EXCAGE LEAF
O1	2017-07-17	Organic	Navel	2	3	1	6.77826	62.3128	EXCAGE LEAF
O1	2017-07-17	Organic	Navel	2	3	2	6.67848	55.8454	EXCAGE LEAF
O1	2017-07-17	Organic	Navel	2	3	3	6.79581	54.5589	EXCAGE LEAF
O1	2017-07-17	Organic	Navel	3	1	1	7.94152	65.3473	EXCAGE LEAF
O1	2017-07-17	Organic	Navel	3	1	2	7.89204	62.26	EXCAGE LEAF
O1	2017-07-17	Organic	Navel	3	1	3	4.15996	51.1445	EXCAGE LEAF
O1	2017-07-17	Organic	Navel	3	2	1	5.32731	69.5083	EXCAGE LEAF
O1	2017-07-17	Organic	Navel	3	2	2	5.07587	87.932	EXCAGE LEAF
O1	2017-07-17	Organic	Navel	3	2	3	3.46225	66.1012	EXCAGE LEAF
O1	2017-07-17	Organic	Navel	3	3	1	3.40788	68.3679	EXCAGE LEAF
O1	2017-07-17	Organic	Navel	3	3	2	2.35209	60.7399	EXCAGE LEAF
O1	2017-07-17	Organic	Navel	3	3	3	2.56082	62.8168	EXCAGE LEAF
O1	2017-07-17	Organic	Navel	5	1	1	7.58576	54.4211	EXCAGE LEAF
O1	2017-07-17	Organic	Navel	5	1	2	7.88401	55.8775	EXCAGE LEAF
O1	2017-07-17	Organic	Navel	5	1	3	6.20847	61.7839	EXCAGE LEAF
O1	2017-07-17	Organic	Navel	5	2	1	9.40502	55.6499	EXCAGE LEAF
O1	2017-07-17	Organic	Navel	5	2	2	9.74152	52.6674	EXCAGE LEAF
O1	2017-07-17	Organic	Navel	5	2	3	8.78162	57.2615	EXCAGE LEAF
O1	2017-07-17	Organic	Navel	6	1	1	11.4613	43.9938	EXCAGE LEAF
O1	2017-07-17	Organic	Navel	6	1	2	12.3866	44.8436	EXCAGE LEAF
O1	2017-07-17	Organic	Navel	6	1	3	10.3752	50.4248	EXCAGE LEAF
O1	2017-07-17	Organic	Navel	7	1	1	8.61165	61.1373	EXCAGE LEAF
O1	2017-07-17	Organic	Navel	7	1	2	9.155	66.6624	EXCAGE LEAF
O1	2017-07-17	Organic	Navel	7	1	3	8.71942	63.0641	EXCAGE LEAF
O1	2017-07-17	Organic	Navel	7	2	1	9.19316	76.1351	EXCAGE LEAF
O1	2017-07-17	Organic	Navel	7	2	2	9.39537	72.2114	EXCAGE LEAF
O1	2017-07-17	Organic	Navel	7	2	3	9.30238	84.9363	EXCAGE LEAF
O1	2017-07-17	Organic	Navel	7	3	1	9.18858	73.2917	EXCAGE LEAF
O1	2017-07-17	Organic	Navel	7	3	2	8.94238	79.1271	EXCAGE LEAF
O1	2017-07-17	Organic	Navel	7	3	3	9.73224	71.47	EXCAGE LEAF
O1	2017-07-17	Organic	Navel	7	4	1	8.94698	73.1377	EXCAGE LEAF
O1	2017-07-17	Organic	Navel	7	4	2	9.47083	68.1508	EXCAGE LEAF
O1	2017-07-17	Organic	Navel	7	4	3	9.14036	62.192	EXCAGE LEAF
O1	2017-07-17	Organic	Navel	8	1	1	9.32647	56.0482	EXCAGE LEAF
O1	2017-07-17	Organic	Navel	8	1	2	9.36048	67.6921	EXCAGE LEAF
O1	2017-07-17	Organic	Navel	8	1	3	6.11308	55.5608	EXCAGE LEAF
O1	2017-07-17	Organic	Navel	8	2	1	13.9036	60.3868	EXCAGE LEAF
O1	2017-07-17	Organic	Navel	8	2	2	13.4816	72.0826	EXCAGE LEAF
O1	2017-07-17	Organic	Navel	8	2	3	13.1263	51.5113	EXCAGE LEAF
O1	2017-07-17	Organic	Navel	9	1	1	10.96	51.7666	EXCAGE LEAF
O1	2017-07-17	Organic	Navel	9	1	2	10.9888	46.1891	EXCAGE LEAF
O1	2017-07-17	Organic	Navel	9	1	3	11.0025	57.2205	EXCAGE LEAF
O1	2017-07-17	Organic	Navel	9	2	1	13.1193	75.2333	EXCAGE LEAF
O1	2017-07-17	Organic	Navel	9	2	2	12.7879	73.2816	EXCAGE LEAF
O1	2017-07-17	Organic	Navel	9	2	3	12.804	66.9477	EXCAGE LEAF
O1	2017-07-17	Organic	Navel	9	3	1	11.7063	68.4843	EXCAGE LEAF
O1	2017-07-17	Organic	Navel	9	3	2	11.979	63.0599	EXCAGE LEAF
O1	2017-07-17	Organic	Navel	9	3	3	11.4966	63.9479	EXCAGE LEAF
O1	2017-07-17	Organic	Navel	10	1	1	18.3928	102.925	EXCAGE LEAF
O1	2017-07-17	Organic	Navel	10	1	2	17.9509	90.5002	EXCAGE LEAF
O1	2017-07-17	Organic	Navel	10	1	3	17.5381	93.5104	EXCAGE LEAF
O1	2017-07-17	Organic	Navel	10	2	1	15.0173	88.4727	EXCAGE LEAF
O1	2017-07-17	Organic	Navel	10	2	2	15.3227	94.1053	EXCAGE LEAF
O1	2017-07-17	Organic	Navel	10	2	3	13.5404	86.1913	EXCAGE LEAF
O1	2017-07-17	Organic	Navel	10	3	1	13.6407	80.5945	EXCAGE LEAF
O1	2017-07-17	Organic	Navel	10	3	2	14.4811	93.6294	EXCAGE LEAF
O1	2017-07-17	Organic	Navel	10	3	3	14.4759	89.5557	EXCAGE LEAF
O1	2017-07-17	Organic	Navel	10	4	1	10.7948	88.3405	EXCAGE LEAF
O1	2017-07-17	Organic	Navel	10	4	2	11.3096	87.8088	EXCAGE LEAF
O1	2017-07-17	Organic	Navel	10	4	3	9.5812	72.9365	EXCAGE LEAF
O5	2017-05-17	Organic	Valencia	1		1	8.77398	73.4419	leaf plant tissue
O5	2017-05-17	Organic	Valencia	1		2	9.33484	124.531	leaf plant tissue
O5	2017-05-17	Organic	Valencia	1		3	9.25937	102.464	leaf plant tissue
O5	2017-05-17	Organic	Valencia	3		1	8.74302	75.8944	leaf plant tissue
O5	2017-05-17	Organic	Valencia	3		2	10.0833	120.165	leaf plant tissue
O5	2017-05-17	Organic	Valencia	3		3	9.53497	124.876	leaf plant tissue
O5	2017-05-17	Organic	Valencia	5		1	8.40621	80.5165	leaf plant tissue
O5	2017-05-17	Organic	Valencia	5		2	10.7025	68.3804	leaf plant tissue
O5	2017-05-17	Organic	Valencia	5		3	10.5658	71.6349	leaf plant tissue
O5	2017-05-17	Organic	Valencia	7		1	11.1722	78.9466	leaf plant tissue
O5	2017-05-17	Organic	Valencia	7		2	10.9481	58.0899	leaf plant tissue
O5	2017-05-17	Organic	Valencia	7		3	11.3785	95.6993	leaf plant tissue
O5	2017-05-17	Organic	Valencia	9		1	11.9296	85.5854	leaf plant tissue
O5	2017-05-17	Organic	Valencia	9		2	11.8871	115.113	leaf plant tissue
O5	2017-05-17	Organic	Valencia	9		3	10.1917	108.997	leaf plant tissue
O6	2017-05-24	Organic	Valencia	1		1	8.98665	113.746	leaf plant tissue
O6	2017-05-24	Organic	Valencia	1		2	8.58856	75.7633	leaf plant tissue
O6	2017-05-24	Organic	Valencia	1		3	7.54303	76.3537	leaf plant tissue
O6	2017-05-24	Organic	Valencia	3		1	8.637	112.411	leaf plant tissue
O6	2017-05-24	Organic	Valencia	3		2	8.01326	89.2952	leaf plant tissue
O6	2017-05-24	Organic	Valencia	3		3	8.78356	106.351	leaf plant tissue
O6	2017-05-24	Organic	Valencia	5		1	9.11444	61.3213	leaf plant tissue
O6	2017-05-24	Organic	Valencia	5		2	8.26724	85.3797	leaf plant tissue
O6	2017-05-24	Organic	Valencia	5		3	9.09879	76.8173	leaf plant tissue
O6	2017-05-24	Organic	Valencia	7		1	5.76144	70.1295	leaf plant tissue
O6	2017-05-24	Organic	Valencia	7		2	5.83375	68.0568	leaf plant tissue
O6	2017-05-24	Organic	Valencia	7		3	5.79917	89.4607	leaf plant tissue
O6	2017-05-24	Organic	Valencia	9		1	5.69849	55.6014	leaf plant tissue
O6	2017-05-24	Organic	Valencia	9		2	4.57252	61.9829	leaf plant tissue
O6	2017-05-24	Organic	Valencia	9		3	5.39792	82.7455	leaf plant tissue
O7	2017-05-24	Organic	Valencia	1		1	5.90972	62.7233	leaf plant tissue
O7	2017-05-24	Organic	Valencia	1		2	4.8788	48.3369	leaf plant tissue
O7	2017-05-24	Organic	Valencia	1		3	5.76557	53.3412	leaf plant tissue
O7	2017-05-24	Organic	Valencia	3		1	6.59471	126.912	leaf plant tissue
O7	2017-05-24	Organic	Valencia	3		2	6.0617	80.0387	leaf plant tissue
O7	2017-05-24	Organic	Valencia	3		3	6.14031	88.6864	leaf plant tissue
O7	2017-05-24	Organic	Valencia	5		1	6.50368	88.0973	leaf plant tissue
O7	2017-05-24	Organic	Valencia	5		2	6.17445	70.5711	leaf plant tissue
O7	2017-05-24	Organic	Valencia	5		3	6.44255	59.2464	leaf plant tissue
O7	2017-05-24	Organic	Valencia	7		1	5.62818	70.3547	leaf plant tissue
O7	2017-05-24	Organic	Valencia	7		2	5.84162	73.3775	leaf plant tissue
O7	2017-05-24	Organic	Valencia	7		3	5.78713	68.6839	leaf plant tissue
O7	2017-05-24	Organic	Valencia	9		1	5.62717	62.6775	leaf plant tissue
O7	2017-05-24	Organic	Valencia	9		2	4.55365	62.4132	leaf plant tissue
O7	2017-05-24	Organic	Valencia	9		3	5.61268	66.6387	leaf plant tissue
O8	2017-05-24	Organic	Valencia	1		1	6.57561	73.6766	leaf plant tissue
O8	2017-05-24	Organic	Valencia	1		2	6.60241	84.4546	leaf plant tissue
O8	2017-05-24	Organic	Valencia	1		3	6.50156	83.8227	leaf plant tissue
O8	2017-05-24	Organic	Valencia	3		1	5.76239	58.0267	leaf plant tissue
O8	2017-05-24	Organic	Valencia	3		2	6.85782	88.9576	leaf plant tissue
O8	2017-05-24	Organic	Valencia	3		3	5.82794	57.7197	leaf plant tissue
O8	2017-05-24	Organic	Valencia	5		1	5.18216	127.706	leaf plant tissue
O8	2017-05-24	Organic	Valencia	5		2	6.03181	71.7893	leaf plant tissue
O8	2017-05-24	Organic	Valencia	5		3	5.83457	81.8867	leaf plant tissue
O8	2017-05-24	Organic	Valencia	7		1	6.54936	108.013	leaf plant tissue
O8	2017-05-24	Organic	Valencia	7		2	5.17124	81.3412	leaf plant tissue
O8	2017-05-24	Organic	Valencia	7		3	5.26932	104.601	leaf plant tissue
O8	2017-05-24	Organic	Valencia	9		1	5.55872	75.6598	leaf plant tissue
O8	2017-05-24	Organic	Valencia	9		2	5.72464	78.5723	leaf plant tissue
O8	2017-05-24	Organic	Valencia	9		3	5.42048	86.5458	leaf plant tissue
C10	2017-05-24	Conventional	Valencia	1		1	2.14908	72.9114	leaf plant tissue
C10	2017-05-24	Conventional	Valencia	1		2	2.60836	81.8376	leaf plant tissue
C10	2017-05-24	Conventional	Valencia	1		3	1.85819	83.2991	leaf plant tissue
C10	2017-05-24	Conventional	Valencia	3		1	2.44337	77.6841	leaf plant tissue
C10	2017-05-24	Conventional	Valencia	3		2	2.41498	70.3122	leaf plant tissue
C10	2017-05-24	Conventional	Valencia	3		3	2.61385	73.6853	leaf plant tissue
C10	2017-05-24	Conventional	Valencia	5		1	1.94781	69.6139	leaf plant tissue
C10	2017-05-24	Conventional	Valencia	5		2	3.13431	74.3532	leaf plant tissue
C10	2017-05-24	Conventional	Valencia	5		3	2.62631	65.7822	leaf plant tissue
C10	2017-05-24	Conventional	Valencia	7		1	3.30936	67.4421	leaf plant tissue
C10	2017-05-24	Conventional	Valencia	7		2	2.19513	74.9523	leaf plant tissue
C10	2017-05-24	Conventional	Valencia	7		3	3.00342	53.3366	leaf plant tissue
C10	2017-05-24	Conventional	Valencia	9		1	1.94682	91.2384	leaf plant tissue
C10	2017-05-24	Conventional	Valencia	9		2	4.38999	70.3767	leaf plant tissue
C10	2017-05-24	Conventional	Valencia	9		3	3.58864	64.7509	leaf plant tissue
O9	2017-05-24	Organic	Valencia	1		1	4.61898	61.4668	leaf plant tissue
O9	2017-05-24	Organic	Valencia	1		2	4.7569	61.0554	leaf plant tissue
O9	2017-05-24	Organic	Valencia	1		3	3.26112	72.4513	leaf plant tissue
O9	2017-05-24	Organic	Valencia	3		1	3.64583	73.0598	leaf plant tissue
O9	2017-05-24	Organic	Valencia	3		2	4.99815	59.4763	leaf plant tissue
O9	2017-05-24	Organic	Valencia	3		3	4.79975	73.9648	leaf plant tissue
O9	2017-05-24	Organic	Valencia	5		1	5.16503	72.2572	leaf plant tissue
O9	2017-05-24	Organic	Valencia	5		2	3.52309	62.9675	leaf plant tissue
O9	2017-05-24	Organic	Valencia	5		3	5.08191	54.265	leaf plant tissue
O9	2017-05-24	Organic	Valencia	7		1	3.93601	72.001	leaf plant tissue
O9	2017-05-24	Organic	Valencia	7		2	5.04757	68.1437	leaf plant tissue
O9	2017-05-24	Organic	Valencia	7		3	3.60859	56.2993	leaf plant tissue
O9	2017-05-24	Organic	Valencia	9		1	5.67769	86.6264	leaf plant tissue
O9	2017-05-24	Organic	Valencia	9		2	5.87381	78.7926	leaf plant tissue
O9	2017-05-24	Organic	Valencia	9		3	5.27722	78.308	leaf plant tissue
O10	2017-05-24	Organic	Valencia	1		1	6.04499	50.2183	leaf plant tissue
O10	2017-05-24	Organic	Valencia	1		2	6.6725	87.4777	leaf plant tissue
O10	2017-05-24	Organic	Valencia	1		3	6.37468	77.4431	leaf plant tissue
O10	2017-05-24	Organic	Valencia	3		1	8.2271	66.5503	leaf plant tissue
O10	2017-05-24	Organic	Valencia	3		2	6.84158	79.7845	leaf plant tissue
O10	2017-05-24	Organic	Valencia	3		3	6.98176	81.3896	leaf plant tissue
O10	2017-05-24	Organic	Valencia	5		1	8.51324	67.8697	leaf plant tissue
O10	2017-05-24	Organic	Valencia	5		2	6.93366	61.6253	leaf plant tissue
O10	2017-05-24	Organic	Valencia	5		3	6.38698	50.145	leaf plant tissue
O10	2017-05-24	Organic	Valencia	7		1	6.80008	43.5778	leaf plant tissue
O10	2017-05-24	Organic	Valencia	7		2	8.00805	84.2711	leaf plant tissue
O10	2017-05-24	Organic	Valencia	7		3	7.60515	92.3023	leaf plant tissue
O10	2017-05-24	Organic	Valencia	9		1	8.65529	90.8352	leaf plant tissue
O10	2017-05-24	Organic	Valencia	9		2	8.13597	108.599	leaf plant tissue
O10	2017-05-24	Organic	Valencia	9		3	8.41494	84.5179	leaf plant tissue
O11	2017-05-24	Organic	Valencia	1		1	8.05553	59.1009	leaf plant tissue
O11	2017-05-24	Organic	Valencia	1		2	8.40657	65.5507	leaf plant tissue
O11	2017-05-24	Organic	Valencia	1		3	8.0265	74.1276	leaf plant tissue
O11	2017-05-24	Organic	Valencia	3		1	8.59018	80.6513	leaf plant tissue
O11	2017-05-24	Organic	Valencia	3		2	8.58504	70.2965	leaf plant tissue
O11	2017-05-24	Organic	Valencia	3		3	8.84347	81.8252	leaf plant tissue
O11	2017-05-24	Organic	Valencia	5		1	7.93455	78.8435	leaf plant tissue
O11	2017-05-24	Organic	Valencia	5		2	9.13477	107.125	leaf plant tissue
O11	2017-05-24	Organic	Valencia	5		3	7.72396	75.0019	leaf plant tissue
O11	2017-05-24	Organic	Valencia	7		1	8.29951	92.9421	leaf plant tissue
O11	2017-05-24	Organic	Valencia	7		2	8.93629	80.8647	leaf plant tissue
O11	2017-05-24	Organic	Valencia	7		3	9.38067	82.4757	leaf plant tissue
O11	2017-05-24	Organic	Valencia	9		1	9.42024	78.7717	leaf plant tissue
O11	2017-05-24	Organic	Valencia	9		2	8.8787	95.733	leaf plant tissue
O11	2017-05-24	Organic	Valencia	9		3	8.59192	88.4235	leaf plant tissue
C9	2017-05-24	Conventional	Valencia	1		1	4.76486	90.0809	leaf plant tissue
C9	2017-05-24	Conventional	Valencia	1		2	4.54598	106.804	leaf plant tissue
C9	2017-05-24	Conventional	Valencia	1		3	5.1273	79.5207	leaf plant tissue
C9	2017-05-24	Conventional	Valencia	3		1	5.39231	112.221	leaf plant tissue
C9	2017-05-24	Conventional	Valencia	3		2	6.24919	141.278	leaf plant tissue
C9	2017-05-24	Conventional	Valencia	3		3	5.757	178.821	leaf plant tissue
C9	2017-05-24	Conventional	Valencia	5		1	4.53497	77.1779	leaf plant tissue
C9	2017-05-24	Conventional	Valencia	5		2	4.81527	80.8594	leaf plant tissue
C9	2017-05-24	Conventional	Valencia	5		3	3.83544	88.693	leaf plant tissue
C9	2017-05-24	Conventional	Valencia	7		1	4.399	92.0103	leaf plant tissue
C9	2017-05-24	Conventional	Valencia	7		2	5.1545	76.3296	leaf plant tissue
C9	2017-05-24	Conventional	Valencia	7		3	4.69856	88.8988	leaf plant tissue
C9	2017-05-24	Conventional	Valencia	9		1	4.49132	89.3437	leaf plant tissue
C9	2017-05-24	Conventional	Valencia	9		2	3.89307	104.622	leaf plant tissue
C9	2017-05-24	Conventional	Valencia	9		3	4.5528	87.5179	leaf plant tissue
C10	2017-05-24	Conventional	Valencia	1		1	6.25877	77.0128	leaf plant tissue
C10	2017-05-24	Conventional	Valencia	1		2	4.60415	58.5034	leaf plant tissue
C10	2017-05-24	Conventional	Valencia	1		3	3.98656	70.9725	leaf plant tissue
C10	2017-05-24	Conventional	Valencia	3		1	3.5734	59.6306	leaf plant tissue
C10	2017-05-24	Conventional	Valencia	3		2	5.22782	57.092	leaf plant tissue
C10	2017-05-24	Conventional	Valencia	3		3	4.87497	83.5716	leaf plant tissue
C10	2017-05-24	Conventional	Valencia	5		1	3.67749	75.7826	leaf plant tissue
C10	2017-05-24	Conventional	Valencia	5		2	4.2924	93.181	leaf plant tissue
C10	2017-05-24	Conventional	Valencia	5		3	3.76739	59.7738	leaf plant tissue
C10	2017-05-24	Conventional	Valencia	7		1	3.28704	60.1739	leaf plant tissue
C10	2017-05-24	Conventional	Valencia	7		2	5.42722	62.939	leaf plant tissue
C10	2017-05-24	Conventional	Valencia	7		3	3.01509	69.1752	leaf plant tissue
C10	2017-05-24	Conventional	Valencia	9		1	4.31775	78.1051	leaf plant tissue
C10	2017-05-24	Conventional	Valencia	9		2	2.75925	60.8311	leaf plant tissue
C10	2017-05-24	Conventional	Valencia	9		3	4.70631	60.6632	leaf plant tissue
